# Supplementary material
Source: PubMed Central journal article supplement (PMC4307600)
Supplement: NIHMS611984-supplement-Supplementary_Data.pdf [file NIHMS611984-supplement-Supplementary_Data.pdf]

## Supplementary Information

### **Exome sequencing identifies recurrent somatic mutations in EIF1AX and SF3B1 in uveal melanoma with disomy 3**

Marcel Martin, Lars Maßhöfer, Petra Temming, Sven Rahmann, Claudia Metz, Norbert Bornfeld, Johannes van de Nes, Ludger Klein-Hitpass, Alan G. Hinnebusch, Bernhard Horsthemke, Dietmar R. Lohmann, Michael Zeschnigk

Supplementary Figures 1, 2 and 3  
Supplementary Tables 1- 5



**Supplementary Figure 2.** Kaplan-Meier survival curves showing disease-specific overall survival (surviving) according to the *SF3B1* and *EIF1AX* genotype.

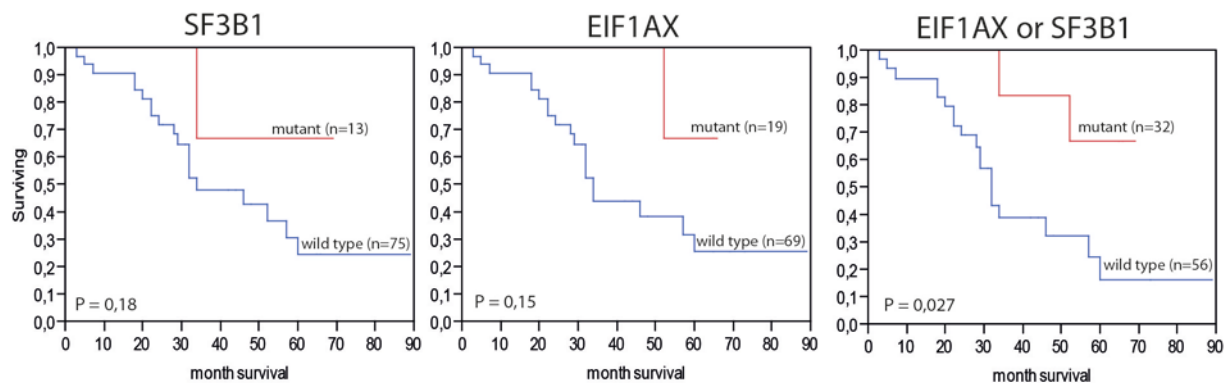

Kaplan-Meier analysis was used to test the statistical significance of differences between the survival curves depending on the *SF3B1* and *EIF1AX* mutation status of tumors. Analysis is based on the cohort of 88 samples comprising samples E1 to E22, M3-1 to M3-35 and D3-1 to D3-31, which were randomly chosen from the cohort of 374 tumor samples. Patients with partM3 (pM3-1 to pM3-13) and disomy 3 tumors that developed metastases (D3met-1 to D3met-10) were excluded from Kaplan Meier analysis as these samples were specifically selected for their chromosome 3 status and presence of metastatic progression, respectively. Month survival indicates the time from date of primary treatment to time of death or end of study.

**Supplementary Figure 3.** Association of *SF3B1* and *EIF1AX* mutations with patient sex.

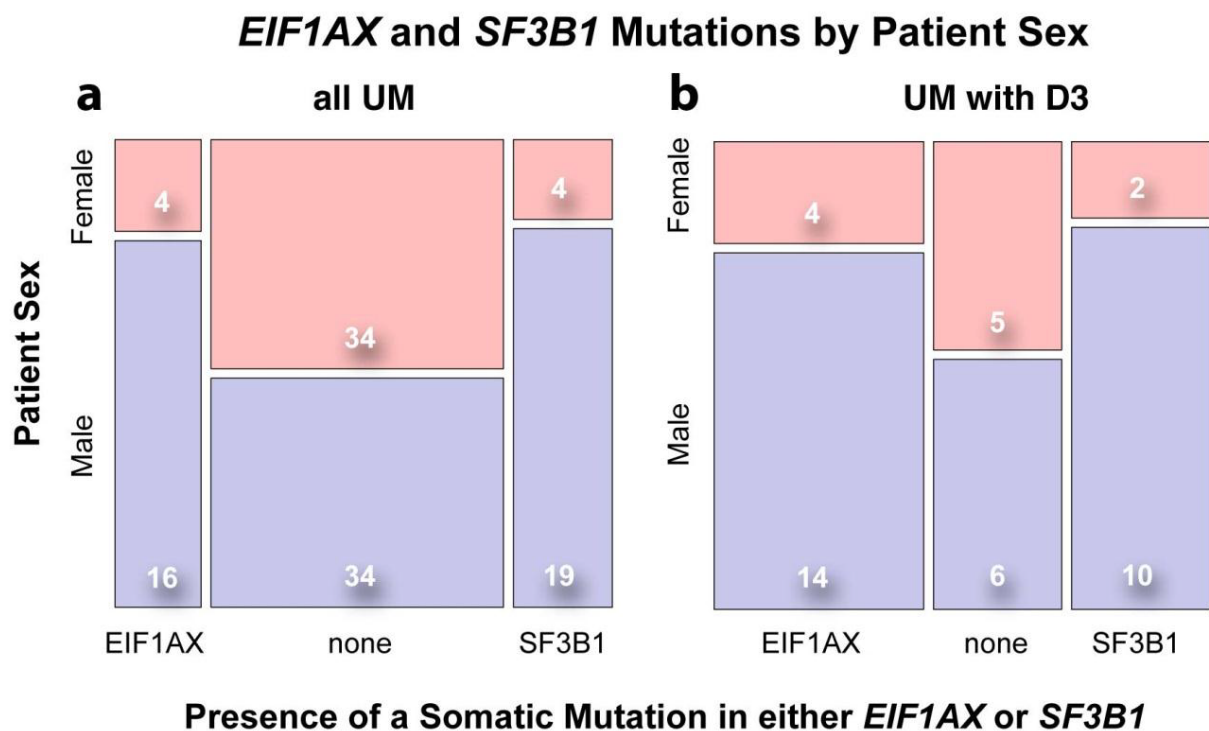

Mosaic plots are used for visualization of results. (a) Numbers of tumors from male patients (blue) and female (red) patients in all uveal melanomas analyzed in this study (n=111) and (b) in the subgroup of uveal melanomas (UM) with D3 (n=51). In both cohorts, tumors with either an *EIF1AX* or a *SF3B1* mutation are more frequently from male patients (blue) compared to tumors without mutation (none). Statistical significance was reached in the cohort of all uveal melanomas (p=0.0012) Fisher's exact test.

**Supplementary Table 1. Sequence variations identified by exome sequencing in 10 uveal melanomas with D3.**

| Gene              | Nucleotide       | Codon     | Amino acid | Quality | Location    |
|-------------------|------------------|-----------|------------|---------|-------------|
| <b>UM-E1 (V2)</b> |                  |           |            |         |             |
| ABCA13            | T → C            | ATA → ACA | I → T      | 656     | 7:48315736  |
| ANGPTL7           | C → T            | ACA → ATA | T → I      | 277     | 1:11255119  |
| ARID2             | G → A            | AGA → AAA | R → K      | 1377    | 12:46287292 |
| C11orf41          | T → A            | ATG → AAG | M → K      | 580     | 11:33640087 |
| CA5BP1            | C → T            | ACC → ATC | T → I      | 866     | X:15706809  |
| CIDEB             | C → G            | GTT → CTT | V → L      | 254     | 14:24779900 |
| COX7A2            | T → TAA          |           |            | 376     | 6:75950109  |
| CTAGE5            | A → ATGTGTG      |           |            | 952     | 14:39784012 |
| EIF1AX            | G → C            | CCC → CGC | P → R      | 1269    | X:20159754  |
| FGFR1             | T → del 14bp     |           |            | 1034    | 8:38271136  |
| GGN               | G → GGGC         |           |            | 304     | 19:38877458 |
| GNAQ              | T → G            | CAA → CCA | Q → P      | 1400    | 9:80409488  |
| ID3               | C → G            | AGG → ACG | R → T      | 244     | 1:23885317  |
| LNP1              | C → ins 42 bp    |           |            | 10800   | 3:100170599 |
| LTB4R2            | C → G            | AAC → AAG | N → K      | 254     | 14:24779900 |
| MYOM2             | C → T            | GCC → GTC | A → V      | 231     | 8:2092886   |
| NAGLU             | C → A            | CGC → AGC | R → S      | 423     | 17:40696233 |
| PABPC1            | C → CAAA         |           |            | 291     | 8:101725026 |
| GRHPR             | T → TAGGCTTGG    |           |            | 273     | 19:48613788 |
| PRB4              | T → T+ ins 60 bp |           |            | 3601    | 12:11461553 |
| PRDM15            | C → T            | GAG → AAG | E → K      | 1467    | 21:43242306 |
| RAB5B             | C → T            | CGG → TGG | R → W      | 877     | 12:56385937 |
| RIC8A             | C → G            | CTC → GTC | L → V      | 921     | 11:211230   |
| SSC5D             | C → CCTT         |           |            | 255     | 19:56029383 |
| TBX21             | A → G            | TAC → TGC | Y → C      | 235     | 17:45822278 |
| TSG101            | TA → T           |           |            | 709     | 11:18502035 |
| UMODL1            | C → C+ ins 42 bp |           |            | 1272    | 21:43557735 |
| WWC3              | G → A            | GCC → ACC | A → T      | 342     | X:10096160  |
| XRCC6             | G → A            | GTG → ATG | V → M      | 1259    | 22:42049682 |
| <b>UM-E2(V1)</b>  |                  |           |            |         |             |
| ANKRD37           | C → CA           |           |            | 281     | 4:186321686 |
| ARHGDIG           | T → C            | ICC → CCC | S → P      | 91      | 16:331733   |
| CD226             | G → A            | CGG → TGG | R → W      | 77      | 18:67530439 |
| CLDN9             | C → T            | CAC → TAC | H → Y      | 125     | 16:3063111  |
| COX7A2L           | T → TA           |           |            | 111     | 2:42578274  |
| CROCCP2           | A → G            | ATT → ACT | I → T      | 84      | 1:16947952  |
| DGKI              | C → T            | GAA → AAA | E → K      | 104     | 7:137178550 |
| DNAJC18           | C → T            | GTC → ATC | V → I      | 238     | 5:138761888 |
| DPP6              | TTACA → T        |           |            | 355     | 7:154676079 |
| EIF1AX            | T → C            | AAG → GAG | K → E      | 126     | X:20159752  |
| EYS               | A → G            | ICC → CCC | S → P      | 84      | 6:65300335  |
| FLG               | C → T            | AGC → AAC | S → N      | 76      | 1:152278687 |
| GNAQ              | T → A            | CAA → CTA | Q → L      | 111     | 9:80409488  |
| HIAT1             | G → C            |           |            | 98      | 1:100533752 |
| IL17RE            | C → CCCCAG       |           |            | 637     | 3:9953057   |
| KIAA1755          | G → A            | ACT → ATT | T → I      | 137     | 20:36868073 |
| MTMR1             | C → T            | CTT → TTT | L → F      | 81      | X:149904435 |
| NPY5R             | C → T            | CCC → CTC | P → L      | 137     | 4:164265555 |
| PIK3AP1           | C → A            | AGA → ATA | R → I      | 78      | 10:98353389 |
| GRHPR             | T → C            | ATA → ATG | I → M      | 133     | 1:46597703  |
| PPP1CB            | C → T            | ACT → ATT | T → I      | 178     | 2:28974897  |
| PTK7              | T → TAAA         |           |            | 70      | 6:43112864  |
| SHROOM3           | GAGA → G         |           |            | 190     | 4:77661673  |
| SIGLEC1           | C → T            | CGT → CAT | R → H      | 197     | 20:3670193  |
| TERT              | T → C            | AAT → GAT | N → D      | 118     | 5:1253283   |

|                   |                |                  |       |      |              |
|-------------------|----------------|------------------|-------|------|--------------|
| TOM1L2            | C → A          | <u>GCA</u> → TCA | A → S | 96   | 17:17772922  |
| TRPM3             | G → T          | <u>AAC</u> → AAA | N → K | 112  | 9:73151391   |
| TRUB1             | A → del 15bp   |                  |       | 656  | 10:116698132 |
| VASH1             | C → A          | <u>CAC</u> → CAA | H → Q | 81   | 14:77229145  |
| ZNF519            | TG → T         |                  |       | 168  | 18:14105271  |
| ZNF665            | C → T          | <u>CGA</u> → CAA | R → Q | 94   | 19:53668418  |
| ZNF720            | A → del 8bp    |                  |       | 278  | 16:31769147  |
| ZNHIT6            | T → TA         |                  |       | 103  | 1:86123663   |
| <b>UM-E3 (V2)</b> |                |                  |       |      |              |
| ACSS2             | AGTGTGT → A    |                  |       | 487  | 20:33507379  |
| DDHD1             | T → TGTCGCC    |                  |       | 786  | 14:53619480  |
| DHFR              | T → del 9bp    |                  |       | 376  | 5:79950708   |
| <b>EIF1AX</b>     | T → C          | <u>AAT</u> → GAT | N → D | 2377 | X:20159749   |
| FBXO9             | A → ATG        |                  |       | 335  | 6:52962702   |
| FPR1              | T → C          | <u>GAG</u> → GGG | E → G | 928  | 19:52249682  |
| GALK1             | CCAT → C       |                  |       | 292  | 17:73754552  |
| <b>GNA11</b>      | A → T          | <u>CAG</u> → CTG | Q → L | 961  | 19:3118942   |
| HTR3D             | A → ATGTCAGT   |                  |       | 2405 | 3:183756836  |
| KCND1             | G → C          | <u>CCC</u> → CGC | P → R | 1224 | X:48820044   |
| KIAA1967          | G → GGCAGTCC   |                  |       | 1194 | 8:22477078   |
| KRT83             | G → T          | <u>TGC</u> → TGA | C → * | 1048 | 12:52711549  |
| MANSC1            | T → TGAA       |                  |       | 3197 | 12:12483419  |
| MICA              | T → C          | <u>GTT</u> → GCT | V → A | 253  | 6:31380153   |
| MSH3              | TGCAGCGGCC → T |                  |       | 376  | 5:79950708   |
| <b>NEB</b>        | G → A          | <u>CCT</u> → TCT | P → S | 667  | 2:152482101  |
| NID2              | T → C          | <u>TAC</u> → TGC | Y → C | 2374 | 14:52472490  |
| OBSL1             | C → T          | <u>GTG</u> → ATG | V → M | 502  | 2:220432019  |
| PLEKHG6           | C → A          | <u>ACG</u> → AAG | T → K | 398  | 12:6436545   |
| <b>GRHPR</b>      | C → CTGG       |                  |       | 976  | 8:10466024   |
| <b>RTKN</b>       | C → T          | <u>GAG</u> → AAG | E → K | 316  | 2:74666963   |
| THSD7B            | G → T          | <u>AGT</u> → ATT | S → I | 2385 | 2:138208478  |
| TNXB              | G → A          | <u>CGC</u> → TGC | R → C | 403  | 6:32025910   |
| <b>UM-E4(V1)</b>  |                |                  |       |      |              |
| ACSF2             | G → T          | <u>GAT</u> → TAT | D → Y | 82   | 17:48538362  |
| AMOTL1            | G → A          | <u>GCC</u> → ACC | A → T | 79   | 11:94592780  |
| C8orf17           | G → A          | <u>GAA</u> → AAA | E → K | 284  | 8:140944536  |
| CUL4A             | G → A          |                  |       | 118  | 13:113863077 |
| FERMT1            | G → T          |                  |       | 81   | 20:6078161   |
| <b>GNA11</b>      | A → T          | <u>CAG</u> → CTG | Q → L | 127  | 19:3118942   |
| MSLN              | C → T          | <u>CCT</u> → CTT | P → L | 124  | 16:812664    |
| OR10AG1           | C → T          | <u>AGC</u> → AAC | S → N | 84   | 11:55735776  |
| PAPOLB            | C → T          | <u>GAT</u> → AAT | D → N | 78   | 7:4900817    |
| PDXDC1            | T → C          | <u>AIT</u> → ACT | I → T | 103  | 16:15110016  |
| PLEKHA1           | G → A          | <u>CGT</u> → CAT | R → H | 91   | 10:124183731 |
| <b>PRB4</b>       | C → ins 49 bp  |                  |       | 547  | 12:11461552  |
| RAB11FIP1         | G → A          | <u>CCT</u> → CTT | P → L | 71   | 8:37730656   |
| RANBP6            | AT → A         |                  |       | 73   | 9:6012689    |
| RETSAT            | T → C          | <u>ATC</u> → GTC | I → V | 167  | 2:85572948   |
| RPS8              | C → G          | <u>CTC</u> → GTC | L → V | 102  | 1:45242527   |
| S1PR1             | AG → A         |                  |       | 189  | 1:101705688  |
| <b>SF3B1</b>      | C → T          | <u>GAA</u> → AAA | E → K | 84   | 2:198266489  |
| SIN3A             | G → A          | <u>ACG</u> → ATG | T → M | 126  | 15:75722562  |
| <b>GRHPR</b>      | G → GTT        |                  |       | 277  | 1:168262525  |
| <b>THOC4</b>      | C → T          | <u>AGC</u> → AAC | S → N | 78   | 17:79849383  |
| <b>TMEM48</b>     | GA → G         |                  |       | 96   | 1:54284760   |
| TMSB4X            | G → A          | <u>GCG</u> → ACG | A → T | 85   | X:12993247   |
| UBXN6             | C → G          | <u>CGC</u> → CCC | R → P | 80   | 19:4457715   |
| ZNF200            | G → A          | <u>CAA</u> → TAA | Q → * | 107  | 16:3283671   |
| <b>UM-E5(V1)</b>  |                |                  |       |      |              |
| ABCE1             | T → A          | <u>TAA</u> → AAA | * → K | 98   | 4:146044825  |
| ADRB3             | A → AGGG       |                  |       | 91   | 8:37823423   |

|                  |             |                  |       |      |              |
|------------------|-------------|------------------|-------|------|--------------|
| AIM2             | G → C       | <u>CCC</u> → CGC | P → R | 158  | 1:159036025  |
| AKT1             | C → CCCA    |                  |       | 354  | 14:105240509 |
| ANKLE2           | A → C       | <u>GTT</u> → GGT | V → G | 87   | 12:133319056 |
| ANKRD40          | AAAG → A    |                  |       | 132  | 17:48777819  |
| ARHGAP8          | T → TG      |                  |       | 207  | 22:45182413  |
| ARHGEF38         | T → C       | <u>ICC</u> → CCC | S → P | 101  | 4:106552382  |
| ATP6V1D          | A → C       | <u>ITT</u> → GTT | F → V | 74   | 14:67819571  |
| ATP8B4           | G → A       | <u>ACG</u> → ATG | T → M | 98   | 15:50288951  |
| <b>C14orf148</b> | C → G       | <u>TGT</u> → TCT | C → S | 84   | 14:77872965  |
| C1QTNF4          | C → T       | <u>GCC</u> → ACC | A → T | 161  | 11:47612326  |
| C6orf27          | T → C       | <u>GAG</u> → GGG | E → G | 72   | 6:31733787   |
| CASK             | GA → G      |                  |       | 97   | X:41383297   |
| CCNL1            | GAT → G     |                  |       | 447  | 3:156870888  |
| CGN              | A → G       | <u>GAG</u> → GGG | E → G | 87   | 1:151502590  |
| CIDEC            | G → GCC     |                  |       | 94   | 3:9911862    |
| CTAGE12P         | G → A       | <u>GCA</u> → GTA | A → V | 149  | 9:27610673   |
| CTLA4            | A → C       | <u>ATC</u> → CTC | I → L | 75   | 2:204737605  |
| <b>EPPK1</b>     | A → G       | <u>TIC</u> → TCC | F → S | 71   | 8:144946028  |
| FAM194A          | TAAC → T    |                  |       | 210  | 3:150421611  |
| FRG1             | C → A       | <u>CCA</u> → CAA | P → Q | 74   | 4:190876293  |
| <b>GNA11</b>     | A → T       | <u>CAG</u> → CTG | Q → L | 160  | 19:3118942   |
| GRK6             | C → A       | <u>TAC</u> → TAA | Y → * | 77   | 5:176858882  |
| GRPEL2P2         | C → G       | <u>GTC</u> → CTC | V → L | 90   | X:63917770   |
| HDAC6            | G → T       | <u>GCA</u> → TCA | A → S | 76   | X:48675775   |
| HMBOX1           | T → G       | <u>TAT</u> → TAG | Y → * | 96   | 8:28908762   |
| ITIH1            | T → TG      |                  |       | 125  | 3:52824945   |
| KALRN            | C → CT      |                  |       | 70   | 3:124044864  |
| KRT15            | T → TG      |                  |       | 178  | 17:39670095  |
| KRT8P13          | T → G       | <u>CIT</u> → CGT | L → R | 98   | 3:170213660  |
| KRTAP19-4        | G → C       | <u>TAC</u> → TAG | Y → * | 97   | 21:31869285  |
| LIAS             | A → C       | <u>ACC</u> → CCC | T → P | 167  | 4:39465205   |
| <b>MAN2B1</b>    | AGCT → A    |                  |       | 363  | 19:12771926  |
| MCL1             | T → C       | <u>AGG</u> → GGG | R → G | 249  | 1:150551031  |
| MEST             | AG → A      |                  |       | 236  | 7:130140501  |
| NEFM             | G → C       | <u>GGG</u> → CGG | G → R | 266  | 8:24775457   |
| <b>NHLRC3</b>    | T → TTGTGGG |                  |       | 1782 | 13:39618366  |
| NLGN3            | A → C       | <u>ACC</u> → CCC | T → P | 103  | X:70387352   |
| NRL              | G → T       | <u>ACC</u> → AAC | T → N | 98   | 14:24551828  |
| NTSR1            | G → A       | <u>ATG</u> → ATA | M → I | 425  | 20:61386051  |
| <b>PAK1IP1</b>   | GTT → G     |                  |       | 133  | 6:10695136   |
| PAX5             | TTTC → T    |                  |       | 107  | 9:37034092   |
| <b>PEX14</b>     | C → T       | <u>CCG</u> → CTG | P → L | 112  | 1:10689653   |
| PFKM             | C → A       | <u>TAC</u> → TAA | Y → * | 73   | 12:48536648  |
| PKP2             | T → C       | <u>CAA</u> → CGA | Q → R | 86   | 12:32996166  |
| PLEKHG2          | G → C       | <u>GGG</u> → CGG | G → R | 92   | 19:39915662  |
| POLN             | C → A       | <u>GAT</u> → TAT | D → Y | 134  | 4:2159611    |
| POLR1C           | G → T       | <u>GAG</u> → GAT | E → D | 145  | 6:43497075   |
| PPL              | T → G       | <u>ACC</u> → CCC | T → P | 135  | 16:4935256   |
| <b>PSMB9</b>     | CAA → C     |                  |       | 91   | 6:32824975   |
| PUS7             | C → A       | <u>GAT</u> → TAT | D → Y | 197  | 7:105135794  |
| <b>SF3B1</b>     | G → A       | <u>CGT</u> → TGT | R → C | 184  | 2:198267484  |
| SH3BGRL3         | TGGC → T    |                  |       | 265  | 1:26606531   |
| SLC45A4          | C → T       | <u>CGG</u> → CAG | R → Q | 679  | 8:142231750  |
| SLC5A3           | G → A       | <u>GTT</u> → ATT | V → I | 97   | 21:35469715  |
| SLC6A7           | T → TG      |                  |       | 316  | 5:149584111  |
| SLC9A7P1         | A → C       | <u>TGT</u> → TGG | C → W | 92   | 12:98849904  |
| <b>THOC4</b>     | CA → C      |                  |       | 162  | 17:79846299  |
| TIE1             | C → T       | <u>TCT</u> → TTT | S → F | 193  | 1:43788419   |
| UBE2G2           | GA → G      |                  |       | 108  | 21:46191155  |
| <b>XYLB</b>      | CTCT → C    |                  |       | 670  | 3:38411758   |

**UM-E6(V2)**

|                  |                  |                  |       |      |              |
|------------------|------------------|------------------|-------|------|--------------|
| BANK1            | C → A            | <u>CAA</u> → AAA | Q → K | 624  | 4:102965061  |
| C3orf63          | A → ATCTT        |                  |       | 314  | 3:56655371   |
| <b>CTAGE5</b>    | GA → G           |                  |       | 1816 | 14:39784901  |
| DNM3             | TGAAACAC → T     |                  |       | 8263 | 1:172051048  |
| DRG2             | G → A            | <u>GAT</u> → AAT | D → N | 1525 | 17:18009694  |
| EFNB1            | G → A            | <u>CGG</u> → CAG | R → Q | 1542 | X:68058543   |
| <b>EPPK1</b>     | AC → A           |                  |       | 565  | 8:144940080  |
| FAHD2B           | G → T            | <u>CAC</u> → CAA | H → Q | 794  | 2:97751578   |
| FAM8A6P          | T → G            | <u>AAT</u> → ACT | N → T | 218  | 6:134925043  |
| FOS              | C → A            | <u>CCT</u> → ACT | P → T | 264  | 14:75747747  |
| GIMAP2           | CGTGTGTGT → C    |                  |       | 421  | 7:150384193  |
| <b>GNAQ</b>      | T → G            | <u>CAA</u> → CCA | Q → P | 1924 | 9:80409488   |
| HBE1             | T → A            | <u>CAC</u> → CTC | H → L | 1014 | 11:5289790   |
| LILRA4           | CT → C           |                  |       | 1537 | 19:54849337  |
| LIMS2            | TGGGTTGCCG → T   |                  |       | 388  | 2:128432620  |
| LRRC43           | AGTAAAG → A      |                  |       | 970  | 12:122687999 |
| MTA1             | C → T            | <u>CGG</u> → TGG | R → W | 277  | 14:105936014 |
| MYT1L            | GCTTT → G        |                  |       | 1818 | 2:1844667    |
| <b>NEB</b>       | T → A            | <u>AAA</u> → ATA | K → I | 3050 | 2:152501052  |
| <b>GRHPR</b>     | GAATT → G        |                  |       | 465  | 5:176715679  |
| OGFOD1           | C → G            | <u>CGG</u> → GGG | R → G | 1387 | 16:56485537  |
| OR5T3            | G → T            | <u>TGC</u> → TTC | C → F | 1945 | 11:56019980  |
| PATE1            | A → AC           |                  |       | 728  | 11:125618727 |
| <b>PLA2G4C</b>   | T → TAGGCTTGG    |                  |       | 429  | 19:48613788  |
| <b>SF3B1</b>     | C → T            | <u>CGT</u> → CAT | R → H | 1968 | 2:198267483  |
| SH3D19           | T → G            | <u>TTA</u> → TTC | L → F | 1132 | 4:152054187  |
| <b>SIGLEC6</b>   | CAGAGA → C       |                  |       | 251  | 19:52035064  |
| SLC19A3          | ATT → A          |                  |       | 218  | 2:228567111  |
| THEM5            | G → GCA          |                  |       | 305  | 1:151819738  |
| TMEM141          | G → GAAGA        |                  |       | 388  | 9:139694454  |
| ZNF595           | G → A            | <u>CGG</u> → CGA | R → R | 252  | 4:53364      |
| ZNF99            | T → T+ ins 46 bp |                  |       | 575  | 19:22939006  |
| <b>UM-E7(V1)</b> |                  |                  |       |      |              |
| TNFRSF8          | G → T            | <u>GAG</u> → GAT | E → D | 147  | 1:12202435   |
| ABCB4            | A → C            | <u>TGT</u> → TGG | C → W | 73   | 7:87072692   |
| ACBD5            | C → T            |                  |       | 129  | 10:27497174  |
| ACOX3            | G → A            | <u>CAC</u> → TAC | H → Y | 134  | 4:8376819    |
| AGPAT6           | G → A            | <u>CGA</u> → CAA | R → Q | 152  | 8:41466957   |
| AHNAK            | T → A            | <u>ATA</u> → TTA | I → L | 139  | 11:62292432  |
| ALOX15P2         | A → G            | <u>ATC</u> → GTC | I → V | 184  | 9:95678374   |
| ANKMY1           | TAAG → T         |                  |       | 175  | 2:241418970  |
| ARHGAP12         | G → A            | <u>TCA</u> → TTA | S → L | 246  | 10:32197257  |
| ATP5G2           | G → C            | <u>GCA</u> → GGA | A → G | 102  | 12:54069990  |
| BMS1P4           | T → C            | <u>AAG</u> → GAG | K → E | 166  | 10:75479808  |
| CARD9            | G → T            |                  |       | 144  | 9:139264898  |
| CCDC141          | T → G            | <u>ACT</u> → CCT | T → P | 75   | 2:179721067  |
| CHKB             | A → T            | <u>TAC</u> → AAC | Y → N | 88   | 22:51020695  |
| CNTNAP2          | C → T            | <u>ACT</u> → ATT | T → I | 213  | 7:146818188  |
| CNTNAP3          | T → A            | <u>TAA</u> → TTA | * → L | 96   | 9:39085702   |
| CPD              | G → A            | <u>GTA</u> → ATA | V → I | 174  | 17:28788961  |
| CROCCP1          | C → G            | <u>TCC</u> → TGC | S → C | 75   | X:134571935  |
| CTSF             | T → C            | <u>GAC</u> → GGC | D → G | 94   | 11:66332456  |
| CTSK             | G → A            | <u>CGA</u> → TGA | R → * | 240  | 1:150772083  |
| <b>CTU2</b>      | T → G            | <u>TIT</u> → TGT | F → C | 71   | 16:88781759  |
| DHX38            | T → TGGG         |                  |       | 257  | 16:72143354  |
| DUPD1            | G → A            | <u>CAG</u> → TAG | Q → * | 126  | 10:76797734  |
| E2F1             | C → T            | <u>GTA</u> → ATA | V → I | 113  | 20:32265070  |
| EHMT2            | G → T            | <u>TAC</u> → TAA | Y → * | 78   | 6:31860811   |
| <b>ELAC2</b>     | T → A            | <u>TTA</u> → TTT | L → F | 73   | 17:12920550  |
| EMILIN3          | C → T            | <u>GAG</u> → AAG | E → K | 236  | 20:39991371  |
| EML1             | C → T            | <u>ACT</u> → ATT | T → I | 163  | 14:100331923 |



|             |         |                   |       |     |              |
|-------------|---------|-------------------|-------|-----|--------------|
| EMR3        | TG → T  |                   |       | 162 | 19:14755035  |
| EPB42       | T → C   | <u>A</u> AG → GAG | K → E | 223 | 15:43502589  |
| EPCAM       | A → C   | AAA → ACA         | K → T | 109 | 2:47606141   |
| EPHA2       | G → A   | <u>T</u> CG → TTG | S → L | 210 | 1:16464919   |
| <b>ESF1</b> | T → C   | AAA → AGA         | K → R | 116 | 20:13740377  |
| EVL         | A → G   | <u>A</u> GC → GGC | S → G | 353 | 14:100551148 |
| EXOG        | G → GCC |                   |       | 109 | 3:38539088   |
| EZR         | C → T   | <u>G</u> GG → GGA | G → G | 198 | 6:159239154  |
| FAM38A      | T → G   | <u>C</u> AA → CAC | Q → H | 71  | 16:88781759  |
| GBP1        | C → T   | <u>G</u> TT → ATT | V → I | 169 | 1:89521758   |
| GLT25D1     | C → G   | <u>G</u> CC → GGC | A → G | 74  | 19:17670179  |
| <b>GNAQ</b> | T → G   | <u>C</u> AA → CCA | Q → P | 141 | 9:80409488   |
| GPBP1       | G → A   | <u>G</u> AA → AAA | E → K | 74  | 5:56526942   |
| GPD1L       | C → T   | <u>A</u> CC → ATC | T → I | 165 | 3:32181850   |
| GPNMB       | A → C   |                   |       | 104 | 7:23300073   |
| GRIA1       | G → T   | <u>G</u> TC → TTC | V → F | 92  | 5:153077634  |
| GRM8        | C → T   | <u>C</u> GC → CAC | R → H | 219 | 7:126086302  |
| H2AFY2      | G → C   | <u>G</u> GG → CGG | G → R | 94  | 10:71835371  |
| HCP5        | T → C   | <u>T</u> IG → TCG | L → S | 420 | 6:31431539   |
| HERC2P9     | G → A   | <u>C</u> GC → CAC | R → H | 108 | 15:28900681  |
| HEY1        | C → G   | <u>G</u> GA → GCA | G → A | 317 | 8:80679408   |
| HUNK        | G → C   | <u>G</u> CC → CCC | A → P | 99  | 21:33346967  |
| IL9RP3      | G → A   |                   |       | 121 | 16:83342     |
| IQGAP3      | A → G   | <u>C</u> TC → CCC | L → P | 116 | 1:156500012  |
| ITGAL       | A → G   | <u>C</u> AA → CGA | Q → R | 89  | 16:30505563  |
| ITPR3       | A → G   | <u>A</u> TG → GTG | M → V | 327 | 6:33639844   |
| KCNJ1       | A → G   | <u>T</u> IT → TCT | F → S | 196 | 11:128710101 |
| KCNQ5       | A → G   | <u>A</u> CA → GCA | T → A | 473 | 6:73904298   |
| KIN         | A → AC  |                   |       | 71  | 10:7820992   |
| MAPK11      | G → A   | <u>C</u> TC → TTC | L → F | 112 | 22:50705002  |
| MAPK7       | A → G   | <u>A</u> TG → GTG | M → V | 84  | 17:19286718  |
| MARCH9      | T → A   | <u>G</u> AT → GAA | D → E | 166 | 12:58152702  |
| MCM2        | T → C   | <u>G</u> CT → GCC | A → A | 143 | 3:127317280  |
| METTL14     | G → A   | <u>G</u> AA → AAA | E → K | 108 | 4:119606619  |
| MEX3C       | T → C   | <u>T</u> AC → TGC | Y → C | 191 | 18:48703475  |
| MLL5        | G → A   | <u>T</u> GT → TAT | C → Y | 122 | 7:104750939  |
| MLLT1       | G → A   | <u>T</u> CC → TTC | S → F | 122 | 19:6222277   |
| MYPN        | G → A   | <u>G</u> GA → AGA | G → R | 299 | 10:69970244  |
| NAPRT1      | G → A   | <u>C</u> CA → CTA | P → L | 139 | 8:144657407  |
| NBAS        | T → G   | <u>A</u> AA → CAA | K → Q | 141 | 2:15694216   |
| NDUFA4      | A → G   | <u>I</u> AC → CAC | Y → H | 104 | 7:10973298   |
| NR4A1       | T → G   | <u>T</u> IG → TGG | L → W | 292 | 12:52450486  |
| NRAP        | G → A   | <u>C</u> GT → TGT | R → C | 258 | 10:115356934 |
| NRSN1       | A → G   | <u>A</u> GG → GGG | R → G | 138 | 6:24146139   |
| NSUN7       | G → C   | <u>C</u> GA → CCA | R → P | 220 | 4:40810367   |
| NUDT22      | G → A   | <u>G</u> GG → AGG | G → R | 76  | 11:63997178  |
| NUP62       | A → G   | <u>T</u> IT → TCT | F → S | 238 | 19:50412400  |
| PARP4P2     | C → T   | <u>T</u> CG → TTG | S → L | 137 | 13:19961896  |
| PCBP2       | C → A   | <u>A</u> GC → AGA | S → R | 173 | 12:53837549  |
| PCDH1       | G → A   | <u>C</u> GT → TGT | R → C | 129 | 5:141244914  |
| PCDHA9      | C → G   | <u>C</u> AG → GAG | Q → E | 74  | 5:140229680  |
| PCNT        | G → A   | <u>G</u> TC → ATC | V → I | 95  | 21:47805876  |
| PIGO        | T → TG  |                   |       | 86  | 9:35095100   |
| PIWIL3      | G → A   | <u>C</u> GT → TGT | R → C | 142 | 22:25115756  |
| PLAT        | C → T   | <u>C</u> GG → CAG | R → Q | 135 | 8:42037631   |
| PLEKHH3     | C → T   | <u>G</u> GT → AGT | G → S | 168 | 17:40823413  |
| POLI        | C → T   | <u>C</u> GT → TGT | R → C | 173 | 18:51813736  |
| POMT2       | C → T   | <u>G</u> AG → AAG | E → K | 190 | 14:77744668  |
| PPIL3       | C → T   | <u>A</u> TG → ATA | M → I | 177 | 2:201746268  |
| PRDM2       | T → C   | <u>I</u> CT → CCT | S → P | 78  | 1:14109088   |
| PRICKLE1    | C → T   | <u>G</u> AA → AAA | E → K | 253 | 12:42853787  |

|                   |               |                   |       |      |              |
|-------------------|---------------|-------------------|-------|------|--------------|
| PRR13             | C → A         | <u>C</u> AT → AAT | H → N | 173  | 12:53837549  |
| PSMC1P9           | A → G         | <u>A</u> AT → AGT | N → S | 73   | 12:18846957  |
| PUS10             | A → AC        |                   |       | 78   | 2:61188596   |
| PUS7L             | C → A         | <u>A</u> AG → AAT | K → N | 259  | 12:44148905  |
| PYGO1             | G → T         | <u>C</u> CA → CAA | P → Q | 125  | 15:55839032  |
| RAD52             | G → A         | <u>T</u> CT → TTT | S → F | 123  | 12:1036290   |
| RASSF4            | G → A         | <u>C</u> GA → CAA | R → Q | 141  | 10:45467103  |
| RLN1              | T → C         | <u>A</u> TG → GTG | M → V | 128  | 9:5335550    |
| RPAP1             | G → C         | <u>A</u> CG → AGG | T → R | 396  | 15:41809846  |
| RTN4IP1           | G → A         | <u>C</u> GT → TGT | R → C | 209  | 6:107070812  |
| SEC24C            | C → T         | <u>C</u> CT → CTT | P → L | 196  | 10:75506754  |
| SEC31A            | A → C         | <u>C</u> AT → CAG | H → Q | 168  | 4:83750231   |
| SHANK2            | G → A         | <u>C</u> CT → TCT | P → S | 142  | 11:70319282  |
| SIGLEC5           | T → C         | <u>A</u> AG → GAG | K → E | 137  | 19:52115666  |
| SLC10A2           | G → A         | <u>C</u> CG → TCG | P → S | 182  | 13:103701690 |
| SLC34A3           | G → C         | <u>G</u> GG → GCG | G → A | 188  | 9:140127546  |
| SLFN13            | G → A         | <u>C</u> TC → TTC | L → F | 77   | 17:33769090  |
| SPAG9             | C → G         | <u>A</u> GT → ACT | S → T | 132  | 17:49071256  |
| SPATA20           | T → C         | <u>I</u> CC → CCC | S → P | 77   | 17:48626179  |
| SSRP1             | G → A         | <u>C</u> CG → CTG | P → L | 185  | 11:57093837  |
| TJP2              | C → A         | <u>C</u> TT → ATT | L → I | 196  | 9:71869368   |
| TLN1              | C → T         | <u>G</u> CC → ACC | A → T | 137  | 9:35706488   |
| TMC8              | C → T         | <u>G</u> CA → GTA | A → V | 263  | 17:76134533  |
| TNK2              | G → C         |                   |       | 117  | 3:195610188  |
| TRIM54            | G → T         | <u>C</u> AG → CAT | Q → H | 277  | 2:27505767   |
| TSFM              | T → A         | <u>T</u> TI → TTA | F → L | 176  | 12:58177018  |
| TTBK1             | T → TG        |                   |       | 77   | 6:43221376   |
| TTC30B            | T → C         | <u>A</u> TC → GTC | I → V | 177  | 2:178417020  |
| TTN               | G → A         | <u>G</u> CA → GTA | A → V | 94   | 2:179612821  |
| TYK2              | C → T         | <u>G</u> AA → AAA | E → K | 186  | 19:10488920  |
| <b>USP15</b>      | T → TC        |                   |       | 262  | 12:62708726  |
| VPS28             | G → A         | <u>C</u> CC → CCT | P → P | 172  | 8:145649171  |
| VWCE              | G → C         | <u>T</u> GC → TGG | C → W | 86   | 11:61059000  |
| <b>XYLB</b>       | A → T         | <u>A</u> CT → TCT | T → S | 107  | 3:38411757   |
| ZFYVE1            | T → A         | <u>A</u> TG → TTG | M → L | 240  | 14:73442454  |
| ZFYVE27           | C → T         | <u>C</u> GC → TGC | R → C | 156  | 10:99508054  |
| ZNF311            | A → G         | <u>T</u> GC → CGC | C → R | 327  | 6:28963866   |
| ZNF337            | TGAG → T      |                   |       | 266  | 20:25656747  |
| ZNF471            | A → G         | <u>A</u> AA → GAA | K → E | 83   | 19:57022937  |
| ZNF714            | G → A         | <u>G</u> GT → AGT | G → S | 112  | 19:21299771  |
| ZSCAN12           | T → C         | <u>G</u> AA → GGA | E → G | 130  | 6:28358610   |
| ZSCAN5C           | G → A         | <u>G</u> CC → ACC | A → T | 106  | 19:56718497  |
| <b>UM-E8 (V2)</b> |               |                   |       |      |              |
| ABCD4             | T → TCCAGAAC  |                   |       | 797  | 14:74756296  |
| ACTG2             | G → GCACA     |                   |       | 660  | 2:74128695   |
| C9orf9            | A → G         | <u>A</u> GA → GGA | R → G | 234  | 9:135765524  |
| CHPF              | T → TGG       |                   |       | 201  | 2:220404354  |
| <b>DDX39B</b>     | AGAC → A      |                   |       | 693  | 6:31498381   |
| DDX54             | C → T         | <u>G</u> CT → ACT | A → T | 219  | 12:113614922 |
| DGCR8             | G → ins 13 bp |                   |       | 3648 | 22:20096314  |
| FAM177A1          | TC → T        |                   |       | 248  | 14:35515953  |
| <b>GNA11</b>      | A → T         | <u>C</u> AG → CTG | Q → L | 240  | 19:3118942   |
| GRIN2B            | CGTA → C      |                   |       | 375  | 12:13716259  |
| HECW2             | C → G         | <u>G</u> AC → CAC | D → H | 229  | 2:197084802  |
| IRF2BPL           | AGCG → A      |                   |       | 218  | 14:77493647  |
| KIAA0100          | CCT → C       |                   |       | 244  | 17:26945865  |
| MRPL4             | GA → G        |                   |       | 240  | 19:10369521  |
| PPP2R3A           | G → A         | <u>A</u> TG → ATA | M → I | 228  | 3:135864037  |
| <b>PRB4</b>       | T → ins 62 bp |                   |       | 631  | 12:11461553  |
| <b>TBX19</b>      | AGTGTGT → A   |                   |       | 343  | 1:168262522  |
| ZNF331            | G → GTGA      |                   |       | 274  | 19:54081561  |

**UM-E9(V2)**

|                |                  |                   |       |      |              |
|----------------|------------------|-------------------|-------|------|--------------|
| ACAT1          | TTAAAAA → T      |                   |       | 547  | 11:108018284 |
| ACTA2          | G → GT           |                   |       | 350  | 10:90706753  |
| AKR7L          | A → ATTTG        |                   |       | 308  | 1:19592799   |
| BAI3           | C → G            | <u>C</u> AG → GAG | Q → E | 1683 | 6:69943291   |
| BBOX1          | A → AC           |                   |       | 250  | 11:27149300  |
| C12orf43       | AAAAG → A        |                   |       | 2163 | 12:121444022 |
| CDH8           | C → T            | <u>G</u> GC → GAC | G → D | 1449 | 16:61761002  |
| CDSN           | G → C            | <u>C</u> CC → GCC | P → A | 248  | 6:31083197   |
| CP             | T → TCACAC       |                   |       | 983  | 3:148897498  |
| CPA1           | A → AAC          |                   |       | 243  | 7:130024308  |
| CTNND2         | G → A            | <u>T</u> CA → TTA | S → L | 3225 | 5:10988339   |
| CYB5D2         | A → C            | <u>G</u> AG → GCG | E → A | 217  | 17:4046946   |
| DACH2          | T → TTGA         |                   |       | 284  | X:86083797   |
| <b>DPP6</b>    | C → CATG         |                   |       | 342  | 7:154675606  |
| DUSP14         | TCTC → T         |                   |       | 292  | 17:35873048  |
| DYRK1A         | T → TTAAG        |                   |       | 1060 | 21:38792452  |
| <b>FBXW7</b>   | T → G            | <u>A</u> AA → ACA | K → T | 3218 | 4:153251894  |
| <b>GNA11</b>   | A → T            | <u>C</u> AG → CTG | Q → L | 1323 | 19:3118942   |
| GRB10          | CTCTCTT → C      |                   |       | 229  | 7:50663293   |
| <b>GRHPR</b>   | A → T            | <u>C</u> AG → CTG | Q → L | 241  | 9:37429608   |
| HOXD3          | G → A            | <u>G</u> GG → AGG | G → R | 573  | 2:177033774  |
| KDM3B          | GAAAA → G        |                   |       | 227  | 5:137762570  |
| LRRC46         | G → C            | <u>G</u> GA → CGA | G → R | 647  | 17:45913048  |
| MITF           | TC → T           |                   |       | 339  | 3:70014309   |
| NCAM1          | T → TTTG         |                   |       | 1463 | 11:113073066 |
| PAX4           | C → CACAT        |                   |       | 535  | 7:127250640  |
| PCDHGA6        | AGTG → A         |                   |       | 818  | 5:140755576  |
| <b>PEX14</b>   | A → C            | <u>G</u> AC → GCC | D → A | 225  | 1:10596547   |
| <b>PRG4</b>    | A → ACTC         |                   |       | 367  | 1:186276262  |
| RBM43          | A → G            | <u>A</u> TA → ACA | I → T | 2450 | 2:152107316  |
| RFTN2          | AAAC → A         |                   |       | 299  | 2:198540351  |
| RNF2           | T → G            | <u>T</u> IT → TGT | F → C | 907  | 1:185069348  |
| <b>SIGLEC6</b> | CAGAGA → C       |                   |       | 345  | 19:52035064  |
| SLC35B1        | GCGCA → G        |                   |       | 958  | 17:47780708  |
| SLC35G5        | A → del 9bp      |                   |       | 221  | 8:11188433   |
| SMURF2         | AAGG → A         |                   |       | 471  | 17:62541850  |
| SPANXN1        | C → CCT          |                   |       | 302  | X:144337370  |
| <b>TAC4</b>    | C → CAG          |                   |       | 616  | 17:47925048  |
| <b>TBX19</b>   | G → GTT          |                   |       | 2197 | 1:168262525  |
| TBX4           | A → AGTGT        |                   |       | 1829 | 17:59560974  |
| <b>TCHH</b>    | T → T + ins 40bp |                   |       | 6356 | 1:152084175  |
| TTC31          | C → CTCTGA       |                   |       | 375  | 2:74710771   |
| TUBB4Q         | TG → T           |                   |       | 286  | 4:190904030  |
| VAV2           | A → ATGAGGGC     |                   |       | 1659 | 9:136637177  |
| VCX3A          | C → A            | <u>A</u> GC → ATC | S → I | 358  | X:6452024    |
| ZFYVE21        | G → ins 13bp     |                   |       | 2958 | 14:104193285 |
| ZNF544         | CCTT → C         |                   |       | 1183 | 19:58773994  |

**UM-E10 (V1)**

|               |           |           |       |     |             |
|---------------|-----------|-----------|-------|-----|-------------|
| <b>ACOT13</b> | G → A     | TGG → TGA | W → * | 123 | 6:24704176  |
| ANKRD23       | T → TC    |           |       | 233 | 2:97499144  |
| CAMK4         | C → CACAT |           |       | 177 | 5:110822240 |
| CNNM3         | T → TC    |           |       | 233 | 2:97499144  |
| DGAT1         | G → T     | TCC → TAC | S → Y | 133 | 8:145539960 |
| FAM47E        | C → T     | CCC → CCT | P → P | 116 | 4:77135334  |
| HPCAL4        | C → G     | GCC → CCC | A → P | 84  | 1:40157202  |
| KIT           | A → T     | AAT → TAT | N → Y | 182 | 4:55604664  |
| LRCH4         | A → ACG   |           |       | 132 | 7:100172241 |
| MYEF2         | A → T     | CTA → CAA | L → Q | 74  | 15:48441252 |
| NOC2L         | G → C     | CAC → CAG | H → Q | 85  | 1:893910    |
| NOL11         | G → T     |           |       | 75  | 17:65732012 |

|              |         |           |       |     |             |
|--------------|---------|-----------|-------|-----|-------------|
| OLFML2B      | C → T   | CGA → CAA | R → Q | 70  | 1:161953880 |
| PAICSP2      | C → T   | CCA → TCA | P → S | 163 | 9:94374087  |
| PCDH8P1      | A → G   | CAC → CGC | H → R | 80  | 13:53776427 |
| PRKCZ        | C → G   | CGC → GGC | R → G | 89  | 1:2005009   |
| PSMD6        | C → A   | GTT → TTT | V → F | 72  | 3:63996654  |
| PXDNL        | G → C   | CCT → CGT | P → R | 134 | 8:52321728  |
| RBM12B       | A → T   | TTT → TAT | F → Y | 80  | 8:94751244  |
| <b>GRHPR</b> | A → ACG |           |       | 132 | 7:100172241 |
| SESN1        | G → A   | CTT → TTT | L → F | 74  | 6:109319979 |
| TUFT1        | C → A   | CTT → ATT | L → I | 80  | 1:151538596 |

**Supplementary Table 2. Sequence variations identified by exome sequencing in 12 uveal melanomas with M3**

| Gene              | Nucleotide   | Codon     | Amino acid | Quality | Location    |
|-------------------|--------------|-----------|------------|---------|-------------|
| <b>UM-E11(V1)</b> |              |           |            |         |             |
| ABCA13            | TG → T       |           |            | 130     | 7:48684204  |
| ANAPC4            | AG → A       |           |            | 192     | 4:25418699  |
| BAP1              | TTCTC → T    |           |            | 2415    | 3:52437209  |
| C14orf148         | C → del 8bp  |           |            | 707     | 14:77872971 |
| C1orf118          | T → C        | GAA → GGA | E → G      | 73      | 1:78353632  |
| CDK10             | CAAGA → C    |           |            | 306     | 16:89753093 |
| CDKN2AIPNL        | AG → A       |           |            | 1965    | 1:226680961 |
| CPE               | G → A        | CGG → CAG | R → Q      | 1642    | 4:166388901 |
| DPP8              | A → T        | ITG → ATG | L → M      | 124     | 15:65809032 |
| EML5              | A → T        | GAT → GAA | D → E      | 631     | 14:89091436 |
| ERLIN2            | A → G        | ATA → GTA | I → V      | 76      | 8:37616155  |
| ESF1              | T → C        | GAC → GGC | D → G      | 808     | 20:13698022 |
| FAM63B            | A → T        | TGA → TGT | * → C      | 71      | 15:59147514 |
| FBXW7             | AC → A       |           |            | 120     | 4:153268226 |
| FUNDC2            | C → T        | ACG → ATG | T → M      | 123     | X:154275504 |
| GAS2L2            | G → C        | CTG → GTG | L → V      | 1960    | 17:34073102 |
| GNAQ              | T → G        | CAA → CCA | Q → P      | 1574    | 9:80409488  |
| GPR85             | A → G        | TGA → CGA | * → R      | 86      | 7:112720515 |
| GRPEL2            | A → G        | AAA → AGA | K → R      | 952     | 5:148730682 |
| HPS3              | T → TCTCTCA  |           |            | 367     | 3:148890105 |
| KIF20B            | T → TAGAA    |           |            | 370     | 10:91492872 |
| MIOS              | G → C        | GAT → CAT | D → H      | 1605    | 7:7625269   |
| MPST              | C → A        | CTT → ATT | L → I      | 74      | 22:37423740 |
| NLRC4             | C → T        | CGT → CAT | R → H      | 80      | 2:32490776  |
| NPEPPS            | G → GTA      |           |            | 175     | 17:45663680 |
| OSBPL9            | G → A        | GGC → AGC | G → S      | 112     | 1:52250178  |
| PAPSS1            | G → ins 15bp |           |            | 1456    | 4:108641363 |
| PKP1              | G → A        | GGG → GAG | G → E      | 70      | 1:201299842 |
| PLEC              | C → T        | TGG → TAG | W → *      | 135     | 8:145011849 |
| PLK2              | C → CA       |           |            | 317     | 5:57755013  |
| PMPCB             | G → A        | ATG → ATA | M → I      | 165     | 7:102949698 |
| PRMT2             | C → CAA      |           |            | 76      | 21:48063387 |
| PVT1              | A → G        | GAG → GGG | E → G      | 77      | 8:128867011 |
| RFX3              | A → C        | ITT → GTT | F → V      | 87      | 9:3219817   |
| RND3              | A → ins 11bp |           |            | 829     | 2:151343988 |
| RNF216            | GA → G       |           |            | 192     | 7:5752975   |
| SEN8              | G → T        | GAG → TAG | E → *      | 638     | 15:72432172 |
| SH3PXD2B          | G → A        | CCA → TCA | P → S      | 74      | 5:171765153 |
| SLC38A10          | G → GT       |           |            | 138     | 17:79225074 |
| SYT17             | T → TTAA     |           |            | 142     | 16:19278429 |
| TICAM1            | G → A        | CCG → CTG | P → L      | 453     | 19:4817623  |
| TLK1              | AAAG → A     |           |            | 140     | 2:171850198 |
| TPTE2             | T → TA       |           |            | 78      | 13:20041493 |
| UBN2              | G → A        | AGC → AAC | S → N      | 146     | 7:138992407 |
| USP46             | G → A        | CCT → CTT | P → L      | 150     | 4:53525471  |
| VOPP1             | AG → A       |           |            | 129     | 7:55589428  |
| <b>UM-E12(V2)</b> |              |           |            |         |             |
| ABCA3             | C → T        | GGG → AGG | G → R      | 331     | 16:2347378  |
| ARHGEF4           | G → A        | CGG → CAG | R → Q      | 612     | 2:131801909 |
| BAP1              | C → CA       |           |            | 318     | 3:52439796  |

|                   |                   |                   |       |       |              |
|-------------------|-------------------|-------------------|-------|-------|--------------|
| C17orf107         | G → GC            |                   |       | 334   | 17:4805179   |
| C18orf55          | G → ins 8bp       |                   |       | 857   | 18:71825720  |
| CYP26B1           | G → A             | <u>T</u> CC → TTC | S → F | 244   | 2:72362310   |
| DSCAML1           | T → C             | <u>T</u> AC → TGC | Y → C | 590   | 11:117387247 |
| ECD               | G → A             | <u>A</u> CG → ATG | T → M | 647   | 10:74894519  |
| ESRP2             | C → G             | <u>A</u> GA → ACA | R → T | 973   | 16:68266368  |
| EXOC1             | G → C             | <u>T</u> TG → TTC | L → F | 388   | 4:56756492   |
| <b>GNA11</b>      | A → T             | <u>C</u> AG → CTG | Q → L | 234   | 19:3118942   |
| INTS12            | A → G             | <u>C</u> TA → CCA | L → P | 307   | 4:106604077  |
| IPPK              | C → G             |                   |       | 929   | 9:95411734   |
| ITGA2             | C → G             |                   |       | 1037  | 5:52344185   |
| KANK1             | A → C             | <u>A</u> AC → ACC | N → T | 534   | 9:738472     |
| KRTAP9-1          | T → T + ins 33 bp |                   |       | 1979  | 17:39346595  |
| LPO               | GAGACAC → G       |                   |       | 464   | 17:56321449  |
| OBSCN             | A → T             | <u>A</u> TG → TTG | M → L | 733   | 1:228432008  |
| PARP4             | G → C             | <u>C</u> AA → GAA | Q → E | 534   | 13:25043224  |
| RBM11             | T → G             | <u>G</u> TG → GGG | V → G | 1918  | 21:15599223  |
| SEMA3C            | T → C             |                   |       | 377   | 7:80546138   |
| <b>SMG6</b>       | C → CGG           |                   |       | 234   | 17:1964759   |
| SNX27             | A → C             |                   |       | 975   | 1:151633272  |
| SYTL4             | A → G             | <u>A</u> TG → ACG | M → T | 674   | X:99931104   |
| TBX22             | C → T             | <u>A</u> CG → ATG | T → M | 480   | X:79278020   |
| <b>UM-E13(V2)</b> |                   |                   |       |       |              |
| ADSS              | T → C             |                   |       | 949   | 1:244601077  |
| <b>BAP1</b>       | C → T             | <u>G</u> AG → AAG | E → K | 2303  | 3:52443601   |
| BRWD1             | T → C             | <u>A</u> AA → GAA | K → E | 1466  | 21:40571463  |
| CEP350            | C → T             | <u>A</u> CC → ATC | T → I | 671   | 1:179989530  |
| CTSA              | C → CCTG          |                   |       | 394   | 20:44520237  |
| CYSLTR2           | T → A             | <u>C</u> TG → CAG | L → Q | 2601  | 13:49281339  |
| EEF1E1            | T → A             | <u>C</u> AT → CTT | H → L | 1751  | 6:8090429    |
| EIF4G2            | C → CGCCTAA       |                   |       | 4498  | 11:10823576  |
| <b>EPB41L3</b>    | T → A             | <u>A</u> AA → TAA | K → * | 1614  | 18:5398073   |
| HOXD8             | C → A             | <u>C</u> CC → CAC | P → H | 266   | 2:176995462  |
| IGKV1-16          | C → CAA           |                   |       | 284   | 2:89399858   |
| ITLN2             | C → A             | <u>G</u> GG → GTG | G → V | 1712  | 1:160917750  |
| KIFC1             | C → CTGTG         |                   |       | 836   | 6:33377482   |
| KRTAP10-13f       | C → CA            |                   |       | 453   | 21:46122300  |
| LANCL1            | G → GAAAA         |                   |       | 505   | 2:211320041  |
| MCC               | G → ins 14bp      |                   |       | 11479 | 5:112406785  |
| MED4              | T → TA            |                   |       | 418   | 13:48664556  |
| MYO1E             | C → T             |                   |       | 1384  | 15:59465940  |
| NCOR2             | C → ins 9bp       |                   |       | 4722  | 12:124824721 |
| NUCKS1            | T → TA            |                   |       | 207   | 1:205686166  |
| OR4C7P            | A → G             | <u>A</u> GA → GGA | R → G | 1076  | 11:51483640  |
| PITRM1            | T → ins 19bp      |                   |       | 4170  | 10:3208567   |
| PLXND1            | T → G             | <u>G</u> AA → GAC | E → D | 1131  | 3:129281619  |
| <b>PRB4</b>       | T → ins 60 bp     |                   |       | 5075  | 12:11461553  |
| SH3GLB1           | C → T             | <u>C</u> GG → TGG | R → W | 302   | 1:87170526   |
| SRD5A2            | G → GAA           |                   |       | 253   | 2:31751175   |
| TRBV6-5           | GT → G            |                   |       | 201   | 7:142180634  |
| <b>UM-E14(V1)</b> |                   |                   |       |       |              |
| ABCA5             | G → A             |                   |       | 86    | 17:67257406  |
| <b>ACOT13</b>     | A → T             | <u>C</u> AC → CTC | H → L | 102   | 6:24667285   |
| ANXA2             | A → G             | <u>T</u> AG → CAG | * → Q | 75    | 15:60674767  |
| ATOX1             | C → T             | <u>G</u> GA → AGA | G → R | 85    | 5:151122448  |

|                   |               |                  |       |     |              |
|-------------------|---------------|------------------|-------|-----|--------------|
| CARS              | G → C         | <u>TCT</u> → TGT | S → C | 74  | 11:3028290   |
| CRTAM             | G → T         |                  |       | 130 | 11:122738808 |
| <b>EPB41L3</b>    | GA → G        |                  |       | 183 | 18:5398116   |
| IL34              | C → T         | <u>CGC</u> → TGC | R → C | 87  | 16:70694371  |
| MAK16             | C → A         | <u>GAC</u> → GAA | D → E | 194 | 8:33354800   |
| OR5P2             | G → ins 12bp  |                  |       | 244 | 11:7818383   |
| PRKRIRP7          | T → A         | <u>AAG</u> → ATG | K → M | 127 | 8:79672511   |
| SBSN              | C → T         | <u>GAG</u> → AAG | E → K | 200 | 19:36018742  |
| SCNM1             | G → GA        |                  |       | 189 | 1:151138531  |
| SELENBP1          | C → T         | <u>GGC</u> → GAC | G → D | 86  | 1:151339509  |
| STXBP4            | C → T         | <u>ACA</u> → ATA | T → I | 74  | 17:53240738  |
| SYNJ1             | G → A         | <u>CGG</u> → TGG | R → W | 96  | 21:34067417  |
| TMEM67            | C → T         |                  |       | 106 | 8:94816980   |
| <b>UMODL1</b>     | C → T         | <u>CGG</u> → TGG | R → W | 79  | 21:43535988  |
| VPS13D            | C → G         | <u>TCC</u> → TGC | S → C | 75  | 1:12343300   |
| WDR78             | G → A         | <u>CCT</u> → CTT | P → L | 88  | 1:67370709   |
| ZNF34             | T → G         | <u>AAG</u> → ACG | K → T | 78  | 8:145999168  |
| ZNF599            | C → A         | <u>CGC</u> → CTC | R → L | 77  | 19:35263882  |
| <b>UM-E15(V1)</b> |               |                  |       |     |              |
| ACSM3             | G → A         | <u>ATG</u> → ATA | M → I | 127 | 16:20797597  |
| ADAP1             | GGA → G       |                  |       | 231 | 7:944952     |
| ANKRD5            | AT → A        |                  |       | 111 | 20:10036321  |
| ARHGAP5           | G → T         | <u>GAA</u> → TAA | E → * | 79  | 14:32561316  |
| ATG12             | CA → C        |                  |       | 84  | 5:115167564  |
| AUTS2             | A → AC        |                  |       | 278 | 7:69900773   |
| C6orf25           | CA → C        |                  |       | 99  | 6:31692675   |
| C7orf30           | CA → C        |                  |       | 99  | 7:23347410   |
| C8orf82           | T → del 15bp  |                  |       | 756 | 8:145753458  |
| CHIC2             | G → C         | <u>ATC</u> → ATG | I → M | 130 | 4:54876307   |
| CLCC1             | C → CT        |                  |       | 156 | 1:109477463  |
| <b>CTU2</b>       | C → ins 60 bp |                  |       | 195 | 16:88779323  |
| <b>DDX39B</b>     | AGAC → A      |                  |       | 560 | 6:31498381   |
| DDX41             | C → G         | <u>CAG</u> → CAC | Q → H | 254 | 5:176938855  |
| DENND1A           | T → TG        |                  |       | 76  | 9:126146187  |
| EEF1D             | T → C         | <u>GAG</u> → GGG | E → G | 103 | 8:144671548  |
| ELF2              | ACACT → A     |                  |       | 308 | 4:140005455  |
| EML3              | G → A         |                  |       | 106 | 11:62370723  |
| FAM108A1          | A → G         | <u>TIG</u> → TCG | L → S | 98  | 19:1881408   |
| FAM53A            | G → A         | <u>CGG</u> → TGG | R → W | 146 | 4:1642932    |
| FAM73B            | A → C         | <u>AGA</u> → AGC | R → S | 90  | 9:131823557  |
| <b>GNA11</b>      | A → T         | <u>CAG</u> → CTG | Q → L | 86  | 19:3118942   |
| GNB1L             | A → AC        |                  |       | 91  | 22:19794180  |
| HACL1             | G → A         | <u>CTT</u> → TTT | L → F | 76  | 3:15613276   |
| HIST1H2BF         | CAGCTCTA → C  |                  |       | 629 | 6:26200155   |
| <b>HMCN1</b>      | AC → A        |                  |       | 204 | 1:186007176  |
| HNF1A             | C → CTCAT     |                  |       | 233 | 12:121434630 |
| INPP5D            | G → T         | <u>CGA</u> → CTA | R → L | 71  | 2:233925074  |
| KCNA5             | T → C         | <u>ICC</u> → CCC | S → P | 89  | 12:5154553   |
| KCNH4             | G → A         | <u>CAG</u> → TAG | Q → * | 267 | 17:40330141  |
| KLHDC8A           | T → TC        |                  |       | 75  | 1:205308910  |
| KRT7              | A → ATGTG     |                  |       | 351 | 12:52631510  |
| LAP3              | GA → G        |                  |       | 264 | 4:17583580   |
| LHX2              | A → AC        |                  |       | 94  | 9:126783420  |
| LRRC45            | C → G         | <u>GCG</u> → GGG | A → G | 71  | 17:79987039  |
| <b>MAN2B1</b>     | G → C         | <u>GCC</u> → GGC | A → G | 71  | 19:12774558  |

|                   |               |                   |       |      |              |
|-------------------|---------------|-------------------|-------|------|--------------|
| MLC1              | T → G         | <u>T</u> AC → TCC | Y → S | 95   | 22:50506878  |
| MTA2              | G → A         | <u>C</u> TC → TTC | L → F | 164  | 11:62369027  |
| <b>NBPF10</b>     | G → A         | <u>G</u> AC → AAC | D → N | 100  | 1:145304580  |
| NEDD4             | A → G         | <u>C</u> TC → CCC | L → P | 83   | 15:56285825  |
| <b>PAK11P1</b>    | GTT → G       |                   |       | 106  | 6:10695136   |
| PDE1B             | T → TGAGAGA   |                   |       | 853  | 12:54967640  |
| POLE              | GAA → G       |                   |       | 78   | 12:133237753 |
| PRAF2             | A → C         | <u>G</u> TC → GGG | V → G | 105  | X:48930262   |
| <b>PSMB9</b>      | CAA → C       |                   |       | 79   | 6:32824975   |
| PTK2B             | G → A         | <u>G</u> GC → GAC | G → D | 324  | 8:27315818   |
| RANBP3L           | C → A         | <u>G</u> GT → TGT | G → C | 226  | 5:36262057   |
| RBPMS             | C → del 13bp  |                   |       | 648  | 8:30242556   |
| RETN              | ATGATGATG → A |                   |       | 428  | 19:7735323   |
| RYR1              | T → G         | <u>I</u> TC → GTC | F → V | 152  | 19:39061280  |
| SDAD1P2           | G → A         | <u>C</u> GA → CAA | R → Q | 97   | 20:10368429  |
| SDCCAG8           | G → T         |                   |       | 117  | 1:243471186  |
| SESN2             | T → TG        |                   |       | 111  | 1:28598877   |
| SFXN3             | T → G         |                   |       | 100  | 10:102795430 |
| SPDEF             | G → C         | <u>C</u> CC → GCC | P → A | 93   | 6:34508890   |
| SPECC1L           | A → G         |                   |       | 105  | 22:24761603  |
| SZT2              | C → G         | <u>G</u> CT → GGT | A → G | 182  | 1:43898016   |
| <b>TBX19</b>      | G → GTT       |                   |       | 366  | 1:168262525  |
| TTC5              | A → G         | <u>I</u> CC → CCC | S → P | 84   | 14:20757725  |
| WDR70             | C → T         | <u>C</u> CC → CTC | P → L | 91   | 5:37723123   |
| <b>UM-E16(V1)</b> |               |                   |       |      |              |
| CALCOCO1          | C → A         | <u>G</u> AC → TAC | D → Y | 144  | 12:54105937  |
| CCDC9             | G → A         |                   |       | 115  | 19:47768204  |
| <b>GNA11</b>      | A → T         | <u>C</u> AG → CTG | Q → L | 110  | 19:3118942   |
| HAGH              | A → C         | <u>C</u> IT → CGT | L → R | 83   | 16:1859172   |
| HSD17B14          | C → T         | <u>G</u> GC → AGC | G → S | 102  | 19:49318329  |
| INTS8             | G → T         | <u>T</u> TG → TTT | L → F | 328  | 8:95872032   |
| KCNH3             | T → TGG       |                   |       | 74   | 12:49937653  |
| LCN8              | G → ins 33 bp |                   |       | 451  | 9:139650167  |
| PLG               | T → C         | <u>A</u> TA → ACA | I → T | 72   | 6:161127300  |
| PREX2             | G → GCC       |                   |       | 119  | 8:69104723   |
| UBR5              | A → G         | <u>C</u> IT → CCT | L → P | 80   | 8:103372087  |
| <b>UM-E17(V1)</b> |               |                   |       |      |              |
| AKAP10            | AT → A        |                   |       | 76   | 17:19850685  |
| C1orf111          | G → A         | <u>C</u> CA → TCA | P → S | 71   | 1:162343719  |
| C20orf202         | CAG → C       |                   |       | 179  | 20:1187534   |
| C6orf118          | C → T         | <u>T</u> GG → TGA | W → * | 124  | 6:165715571  |
| COG5              | T → TCA       |                   |       | 356  | 7:106898895  |
| CYP7B1            | C → T         | <u>T</u> GG → TAG | W → * | 79   | 8:65509011   |
| <b>DICER1</b>     | C → CACAA     |                   |       | 577  | 14:95566108  |
| EFCAB2            | A → G         | <u>A</u> AA → AGA | K → R | 85   | 1:245133372  |
| EFCAB6            | G → A         | <u>C</u> CT → TCT | P → S | 146  | 22:44028071  |
| LONRF2            | A → C         | <u>C</u> IT → CGT | L → R | 75   | 2:100891098  |
| MACF1             | G → T         | <u>G</u> TA → TTA | V → L | 78   | 1:39929509   |
| MICAL3            | C → CA        |                   |       | 210  | 22:18359222  |
| <b>NHLRC3</b>     | T → TTGTGGG   |                   |       | 1011 | 13:39618366  |
| NUAK1             | T → A         |                   |       | 132  | 12:106500175 |
| PAGE1             | C → A         | <u>G</u> AG → GAT | E → D | 111  | X:49458727   |
| PPBPL2            | C → G         | <u>G</u> CT → CCT | A → P | 78   | 4:74920219   |
| PRPF6             | G → T         | <u>T</u> GG → TTG | W → L | 84   | 20:62648179  |
| PRSS1             | T → C         | <u>C</u> CT → CCC | P → P | 72   | 7:142459820  |



|                   |               |                  |       |      |              |
|-------------------|---------------|------------------|-------|------|--------------|
| SLC38A6           | A → AG        |                  |       | 102  | 14:61497329  |
| SLC44A2           | G → T         | <u>GGC</u> → TGC | G → C | 136  | 19:10736283  |
| SLITRK2           | C → A         | <u>CAC</u> → CAA | H → Q | 71   | X:144902589  |
| SLITRK3           | T → A         | <u>AGG</u> → TGG | R → W | 118  | 3:164906500  |
| <b>UM-E18(V1)</b> |               |                  |       |      |              |
| ACOT8             | C → CATCT     |                  |       | 350  | 20:44485952  |
| AL137162.1        | TGA → T       |                  |       | 278  | 20:55176869  |
| BIK               | G → A         | <u>CGG</u> → CAG | R → Q | 143  | 22:43525331  |
| BLK               | G → T         | <u>GGT</u> → TGT | G → C | 96   | 8:11367016   |
| BLOC1S2           | TA → T        |                  |       | 114  | 10:102035182 |
| BMP2K             | C → G         | <u>CAC</u> → CAG | H → Q | 165  | 4:79792166   |
| CA13              | A → AG        |                  |       | 130  | 8:86171692   |
| CEP164            | G → C         | <u>GGG</u> → GCG | G → A | 146  | 11:117283020 |
| CRK               | GAA → G       |                  |       | 80   | 17:1326754   |
| CROCCP3           | G → A         | <u>AGC</u> → AGT | S → S | 126  | 1:16802405   |
| CUL4B             | GAA → G       |                  |       | 97   | X:119676896  |
| EMP1              | CA → C        |                  |       | 150  | 12:13364426  |
| FAM46A            | CTT → C       |                  |       | 126  | 6:82459345   |
| GALNT9            | C → T         | <u>CGT</u> → CAT | R → H | 84   | 12:132689997 |
| <b>GNA11</b>      | A → T         | <u>CAG</u> → CTG | Q → L | 259  | 19:3118942   |
| GNG11             | A → AG        |                  |       | 168  | 7:93551420   |
| GTF2F1            | C → T         | <u>GCG</u> → ACG | A → T | 156  | 19:6389582   |
| HOTTIP            | AGC → A       |                  |       | 171  | 7:27245994   |
| INTS4             | T → TAA       |                  |       | 121  | 11:77672189  |
| MAGEA11           | C → T         | <u>ACT</u> → ATT | T → I | 74   | X:148798000  |
| NDOR1             | C → T         | <u>CAC</u> → TAC | H → Y | 79   | 9:140109565  |
| NEMF              | CG → C        |                  |       | 174  | 14:50319523  |
| NUPL2             | CT → C        |                  |       | 124  | 7:23239063   |
| PARP10            | G → C         | <u>TTC</u> → TTG | F → L | 200  | 8:145060617  |
| PCYOX1            | AT → A        |                  |       | 191  | 2:70488522   |
| PDE4DIP           | C → T         | <u>AGC</u> → AAC | S → N | 79   | 1:144855771  |
| PQLC1             | G → A         | <u>CGG</u> → TGG | R → W | 206  | 18:77662788  |
| <b>PRG4</b>       | AAGG → A      |                  |       | 168  | 1:186276055  |
| PSG5              | T → C         | <u>ACG</u> → GCG | T → A | 104  | 19:43689255  |
| PXMP2             | A → AG        |                  |       | 318  | 12:133277869 |
| RAD51AP1          | A → AC        |                  |       | 162  | 12:4648047   |
| SEMA3D            | GA → G        |                  |       | 95   | 7:84671609   |
| SNX9              | G → A         | <u>GTT</u> → ATT | V → I | 84   | 6:158294203  |
| STK32B            | G → A         | <u>TGG</u> → TGA | W → * | 80   | 4:5448723    |
| SUCLG1            | AT → A        |                  |       | 71   | 2:84650856   |
| <b>TMEM48</b>     | GAA → G       |                  |       | 75   | 1:54252939   |
| TPP2              | C → T         | <u>GCT</u> → GTT | A → V | 127  | 13:103330827 |
| TRPC4AP           | G → GT        |                  |       | 148  | 20:33657219  |
| UBTF              | T → C         | <u>AAT</u> → GAT | N → D | 265  | 17:42290282  |
| <b>UM-E19(V2)</b> |               |                  |       |      |              |
| <b>ABCA13</b>     | G → A         | <u>CGG</u> → CAG | R → Q | 2269 | 7:48634343   |
| ANXA1             | G → GGTGTGTGT |                  |       | 1082 | 9:75783796   |
| ARHGAP15          | C → T         |                  |       | 206  | 2:144193167  |
| ATP5SL            | TG → T        |                  |       | 337  | 19:41949872  |
| <b>BAP1</b>       | GC → G        |                  |       | 1352 | 3:52440848   |
| C16orf7           | G → A         | <u>GCG</u> → GTG | A → V | 241  | 16:89775697  |
| C9orf100          | C → del 18bp  |                  |       | 928  | 9:35674190   |
| CACNA1E           | AC → A        |                  |       | 1858 | 1:181549749  |
| CDAN1             | C → T         |                  |       | 401  | 15:43017682  |
| COG4              | G → A         |                  |       | 1094 | 16:70548422  |

|                   |               |                    |       |      |              |
|-------------------|---------------|--------------------|-------|------|--------------|
| CSMD1             | A → AAAC      |                    |       | 262  | 8:2794977    |
| CYP21A2           | A → C         | CCA → CCC          | P → P | 247  | 6:32006119   |
| DAZAP2            | C → CTGTGTG   |                    |       | 1094 | 12:51640388  |
| DNAJC28           | A → C         | C <u>T</u> T → CGT | L → R | 4542 | 21:34860628  |
| FHDC1             | C → T         | C <u>G</u> G → TGG | R → W | 240  | 4:153897087  |
| FOXI2             | G → T         | A <u>G</u> G → AGT | R → S | 601  | 10:129536902 |
| <b>GNAQ</b>       | T → A         | CA <u>A</u> → CTA  | Q → L | 2315 | 9:80409488   |
| ITGA5             | G → C         | C <u>C</u> C → GCC | P → A | 217  | 12:54789902  |
| KRT4              | G → A         | C <u>C</u> T → TCT | P → S | 1407 | 12:53200839  |
| MLL               | A → C         | A <u>A</u> G → ACG | K → T | 1138 | 11:118375489 |
| MYL3              | G → A         | C <u>C</u> C → CTC | P → L | 1220 | 3:46904813   |
| MYO15A            | A → AGTGTGT   |                    |       | 1627 | 17:18034131  |
| NBN               | C → CA        |                    |       | 228  | 8:90947085   |
| NCKAP5L           | C → T         | <u>G</u> TG → ATG  | V → M | 208  | 12:50186044  |
| PCLO              | T → TTAA      |                    |       | 3826 | 7:82581488   |
| <b>PLA2G4C</b>    | T → ins 13bp  |                    |       | 500  | 19:48613788  |
| PNLDC1            | AC → A        |                    |       | 1246 | 6:160241544  |
| PTPRC             | T → C         |                    |       | 1479 | 1:198672503  |
| RBMX              | A → AT        |                    |       | 226  | X:135961585  |
| RECQL             | C → CAAA      |                    |       | 1349 | 12:21623284  |
| REPS2             | A → G         | A <u>G</u> T → GGT | S → G | 1888 | X:17092257   |
| SCYL3             | G → A         | A <u>C</u> G → ATG | T → M | 2542 | 1:169824996  |
| SGOL2             | A → G         | A <u>A</u> T → AGT | N → S | 497  | 2:201437159  |
| SNX13             | C → T         |                    |       | 2103 | 7:17838631   |
| SNX7              | G → C         | G <u>A</u> G → GAC | E → D | 5610 | 1:99225627   |
| <b>TAC4</b>       | TACAC → T     |                    |       | 325  | 17:47925032  |
| TRIM60P15         | AAT → A       |                    |       | 632  | 8:47703897   |
| TTC28             | G → A         | C <u>G</u> T → TGT | R → C | 1047 | 22:28504290  |
| WDPCP             | A → ACGCCGC   |                    |       | 626  | 2:63815498   |
| ZDHHC11B          | C → ins 32 bp |                    |       | 1057 | 5:712012     |
| ZNF250            | A → C         | <u>I</u> TA → GTA  | L → V | 223  | 8:146105917  |
| <b>UM-E20(V1)</b> |               |                    |       |      |              |
| ABCA6             | CTAAA → C     |                    |       | 273  | 17:67125893  |
| ACOT1             | T → G         | <u>G</u> TG → GGG  | V → G | 80   | 14:74004406  |
| ALX3              | A → ins 10bp  |                    |       | 337  | 1:110603286  |
| BBC3              | A → C         |                    |       | 72   | 19:47729819  |
| BNC2              | G → GAATGCACA |                    |       | 383  | 9:16418871   |
| CAMK2B            | G → C         | C <u>T</u> A → GTA | L → V | 72   | 7:44269469   |
| CELA3A            | G → A         | G <u>G</u> T → GAT | G → D | 125  | 1:22331989   |
| CENPP             | G → GGTGCCCC  |                    |       | 409  | 9:95373521   |
| <b>GNAQ</b>       | T → A         | CA <u>A</u> → CTA  | Q → L | 213  | 9:80409488   |
| GNB2L1            | CAAA → C      |                    |       | 167  | 5:180668426  |
| HK2P1             | C → T         | <u>G</u> CT → ACT  | A → T | 114  | X:79827418   |
| HUWE1             | T → G         | A <u>C</u> C → CCC | T → P | 88   | X:53596718   |
| KRT2              | A → AAAGCC    |                    |       | 215  | 12:53045639  |
| NPPB              | T → G         | G <u>A</u> A → GCA | E → A | 84   | 1:11918927   |
| PSMA6P2           | GA → G        |                    |       | 139  | X:12844471   |
| RNF19A            | TAAAAA → T    |                    |       | 79   | 8:101280911  |
| SHH               | A → C         | <u>I</u> TC → GTC  | F → V | 87   | 7:155604729  |
| <b>SMG6</b>       | C → CGG       |                    |       | 163  | 17:1964759   |
| TBC1D24           | G → T         | G <u>G</u> C → GTC | G → V | 82   | 16:2546274   |
| TCEAL3            | C → CA        |                    |       | 93   | X:102864220  |
| TF                | C → T         | C <u>G</u> T → TGT | R → C | 76   | 3:133466081  |
| TONSL             | C → T         | <u>G</u> AG → AAG  | E → K | 73   | 8:145658320  |
| <b>UM-E21(V2)</b> |               |                    |       |      |              |

|                   |                  |                   |       |       |              |
|-------------------|------------------|-------------------|-------|-------|--------------|
| ARGFXP1           | G → GCAGCAC      |                   |       | 2719  | 5:122011916  |
| C15orf62          | G → A            | <u>C</u> GG → CAG | R → Q | 501   | 15:41062767  |
| CDH20             | T → G            | <u>I</u> TT → GTT | F → V | 1246  | 18:59157764  |
| CHPT1             | G → A            | <u>G</u> TG → ATG | V → M | 271   | 12:102091862 |
| CYP2C19           | G → A            |                   |       | 1424  | 10:96484093  |
| CYP4F12           | C → CT           |                   |       | 286   | 19:15784302  |
| DLD               | A → AGC          |                   |       | 731   | 7:107531492  |
| EPS8L2            | G → GGGGACA      |                   |       | 378   | 11:721725    |
| FAM160A1          | C → CTT          |                   |       | 345   | 4:152583907  |
| FAM75C2           | G → del 17bp     |                   |       | 702   | 9:90748562   |
| FLVCR1            | G → GA           |                   |       | 1304  | 1:213068548  |
| <b>GNAQ</b>       | T → G            | <u>C</u> AA → CCA | Q → P | 1998  | 9:80409488   |
| GNB2              | TACG → T         |                   |       | 844   | 7:100276186  |
| GZMH              | C → A            | <u>G</u> AC → TAC | D → Y | 1144  | 14:25075922  |
| IGFN1             | A → A + ins 70bp |                   |       | 1935  | 1:201178924  |
| IGHV4-31          | G → C            | <u>C</u> CA → CGA | P → R | 592   | 14:106805480 |
| KCNN3             | T → TTGC         |                   |       | 226   | 1:154842330  |
| LCE1B             | T → C            | <u>I</u> GC → CGC | C → R | 429   | 1:152784992  |
| <b>MST1</b>       | C → G            | <u>T</u> AG → TAC | * → Y | 349   | 3:49721461   |
| RBM15B            | C → CT           |                   |       | 208   | 3:51433688   |
| SMPD1             | T → del 12 bp    |                   |       | 818   | 11:6411935   |
| <b>TCHH</b>       | T → del 17bp     |                   |       | 2104  | 1:152084175  |
| TNRC18C           | G → A            | <u>G</u> CT → ACT | A → T | 215   | 7:57063667   |
| TSHR              | T → ins 14bp     |                   |       | 15026 | 14:81574845  |
| <b>USP15</b>      | G → T            | <u>G</u> GA → GTA | G → V | 1778  | 12:62688058  |
| ZNF169            | T → TTTGTG       |                   |       | 351   | 9:97054889   |
| ZNF267            | C → T            | <u>C</u> AT → TAT | H → Y | 653   | 16:31926129  |
| <b>UM-E22(V1)</b> |                  |                   |       |       |              |
| AACS              | G → A            |                   |       | 226   | 12:125609242 |
| ACCN4             | C → T            | <u>C</u> CC → CTC | P → L | 128   | 2:220402953  |
| ANKRD10           | TCTC → T         |                   |       | 369   | 13:111532241 |
| ARAP1             | C → A            | <u>T</u> GC → TTC | C → F | 302   | 11:72423723  |
| ARL5B             | C → G            | <u>T</u> CT → TGT | S → C | 77    | 10:18964179  |
| ARL8B             | T → G            | <u>T</u> IT → TGT | F → C | 89    | 3:5212420    |
| ASPH              | C → T            | <u>G</u> GT → GAT | G → D | 349   | 8:62627060   |
| BMP1              | G → A            | <u>G</u> GG → GAG | G → E | 117   | 8:22051583   |
| CD276             | G → T            | <u>A</u> GC → ATC | S → I | 194   | 15:73995419  |
| CHSY3             | G → A            | <u>G</u> GG → AGG | G → R | 103   | 5:129521104  |
| CITED2            | CTGG → C         |                   |       | 440   | 6:139694962  |
| CNTNAP1           | T → C            | <u>G</u> TG → GCG | V → A | 298   | 17:40841002  |
| CSMD2             | G → A            |                   |       | 137   | 1:33985558   |
| CSNK2B            | G → C            | <u>T</u> GT → TCT | C → S | 140   | 6:31636695   |
| DEGS1             | A → AGCC         |                   |       | 325   | 1:224370958  |
| <b>DGKI</b>       | G → A            | <u>C</u> GT → TGT | R → C | 142   | 7:137076016  |
| <b>DICER1</b>     | G → C            | <u>C</u> TA → GTA | L → V | 130   | 14:95569742  |
| <b>ELAC2</b>      | G → C            | <u>C</u> GG → GGG | R → G | 191   | 17:12920903  |
| FAM120A           | C → T            | <u>C</u> CC → CTC | P → L | 277   | 9:96318764   |
| FAM178B           | AG → A           |                   |       | 138   | 2:97541815   |
| FGFRL1            | C → T            |                   |       | 140   | 4:1016270    |
| FNIP1             | G → T            | <u>A</u> CT → AAT | T → N | 72    | 5:130762725  |
| FOXK2             | A → G            |                   |       | 76    | 17:80544085  |
| GDF15             | G → A            | <u>A</u> TG → ATA | M → I | 81    | 19:18499664  |
| <b>GNAQ</b>       | T → G            | <u>C</u> AA → CCA | Q → P | 71    | 9:80409488   |
| GRK5              | A → C            |                   |       | 168   | 10:121211954 |
| HIST1H2BE         | G → A            | <u>G</u> GG → GAG | G → E | 280   | 6:26184337   |

|               |          |                   |       |     |              |
|---------------|----------|-------------------|-------|-----|--------------|
| <b>HMCN1</b>  | T → C    | <u>G</u> TT → GCT | V → A | 143 | 1:185963992  |
| IL22RA1       | C → T    | <u>G</u> TG → ATG | V → M | 81  | 1:24463780   |
| ING3          | T → A    | <u>T</u> CA → ACA | S → T | 102 | 7:120610800  |
| INSM2         | G → T    | <u>G</u> GG → GTG | G → V | 156 | 14:36005002  |
| ITGAD         | G → A    | <u>G</u> TG → ATG | V → M | 272 | 16:31424258  |
| KLK3          | GT → G   |                   |       | 123 | 19:51362902  |
| KLK7          | C → T    | <u>G</u> GC → AGC | G → S | 114 | 19:51485671  |
| LRGUK         | G → T    | <u>A</u> TG → ATT | M → I | 73  | 7:133884031  |
| MAPK10        | G → GTGT |                   |       | 173 | 4:87024270   |
| MAPKAP1       | GC → G   |                   |       | 110 | 9:128201009  |
| <b>MST1</b>   | T → C    | <u>A</u> GC → GGC | S → G | 74  | 3:49726195   |
| MST1P9        | A → G    | <u>T</u> CA → CCA | S → P | 91  | 1:17085189   |
| MYBBP1A       | G → C    | <u>T</u> CG → TGG | S → W | 74  | 17:4453362   |
| MYH8          | C → A    |                   |       | 92  | 17:10315922  |
| NAA10         | A → G    | <u>T</u> TT → TCT | F → S | 132 | X:153195297  |
| <b>NBPF10</b> | G → C    | <u>G</u> TT → CTT | V → L | 126 | 1:145303936  |
| OCA2          | G → C    |                   |       | 224 | 15:28270051  |
| OR2T12        | CAGA → C |                   |       | 516 | 1:248458351  |
| PCDH9         | C → T    | <u>G</u> CA → ACA | A → T | 130 | 13:67799890  |
| PDE6B         | C → CA   |                   |       | 357 | 4:651290     |
| PI4KA         | G → A    | <u>C</u> TC → TTC | L → F | 101 | 22:21064203  |
| PTPRG         | C → A    | <u>A</u> CT → AAT | T → N | 179 | 3:62254804   |
| RASA1         | G → T    | <u>G</u> GT → GTT | G → V | 105 | 5:86564735   |
| RN7SL1        | C → A    | <u>C</u> GC → AGC | R → S | 75  | 14:50053297  |
| RNF212        | T → C    | <u>A</u> TG → GTG | M → V | 84  | 4:1090375    |
| <b>RTKN</b>   | C → T    | <u>T</u> GG → TAG | W → * | 135 | 2:74653130   |
| SART3         | G → A    | <u>C</u> CT → TCT | P → S | 120 | 12:108926144 |
| SCAF4         | T → G    | <u>A</u> GT → CGT | S → R | 157 | 21:33043671  |
| SDC4          | C → T    | <u>G</u> GA → AGA | G → R | 161 | 20:43964431  |
| SEMA4D        | G → C    | <u>A</u> CC → AGC | T → S | 142 | 9:91978814   |
| SLCO4A1       | C → T    | <u>C</u> GT → TGT | R → C | 72  | 20:61292475  |
| SNX5          | G → A    | <u>C</u> CC → TCC | P → S | 107 | 20:17948836  |
| SPANXD        | C → G    | <u>G</u> GG → CGG | G → R | 83  | X:140785597  |
| SPINLW1       | A → G    | <u>T</u> CT → CCT | S → P | 138 | 20:44170617  |
| SREBF1        | G → A    | <u>C</u> CG → CTG | P → L | 176 | 17:17717013  |
| STX10         | C → T    | <u>C</u> TG → CTA | L → L | 124 | 19:13260990  |
| TRAF2         | G → A    | <u>G</u> AC → AAC | D → N | 157 | 9:139820195  |
| UBE3B         | C → T    | <u>C</u> CG → CTG | P → L | 180 | 12:109958895 |
| USH2A         | C → G    | <u>G</u> GT → GCT | G → A | 130 | 1:215821882  |
| WDR47         | T → C    | <u>A</u> AA → AGA | K → R | 130 | 1:109553799  |

**Supplementary Table 3.** Clinical, histopathological and genetic features of 111 uveal melanoma patients and respective tumor samples.

| Patient |     |            |     | Tumor  |          |             |                   |          |     |              |         |             |          |                     |                  |                   |
|---------|-----|------------|-----|--------|----------|-------------|-------------------|----------|-----|--------------|---------|-------------|----------|---------------------|------------------|-------------------|
| ID      | age | met. death | sex | Chr. 3 | LBD [mm] | height [mm] | ciliary body inv. | celltype | EOG | mutant genes |         | position    | Type     | predicted AA change | EIF1AX cDNA seq. | EIF1AY expression |
|         |     |            |     |        |          |             |                   |          |     | GNAQ/11      | others  |             |          |                     |                  |                   |
| E1      | 79  |            | m   | D3     | 14       | 87          | no                | spindle  | no  | GNAQ         | EIF1AX  | X:20159754  | C→G      | p.P2R               | no               | na                |
| E2      | 46  |            | m   | D3     | 11.6     | 8.9         | no                | spindle  | no  | GNAQ         | EIF1AX  | X:20159752  | A→G      | p.K3E               | no               | na                |
| E3      | 39  |            | m   | D3     | 12.9     | 6.6         | no                | spindle  | no  | GNA11        | EIF1AX  | X:20159749  | A→G      | p.N4D               | no               | na                |
| E4      | 54  |            | m   | D3     | 12.2     | na          | yes               | spindle  | no  | GNA11        | SF3B1   | 2:198266489 | G→A      | p.E783K             | no               | na                |
| E5      | 48  |            | f   | D3     | 19       | 14          | yes               | spindle  | yes | GNA11        | SF3B1   | 2:198267484 | C→T      | p.R625C             | no               | na                |
| E6      | 69  |            | f   | D3     | 11.2     | 5.8         | no                | spindle  | na  | GNAQ         | SF3B1   | 2:198267483 | G→A      | p.R625H             | yes              | no                |
| E7      | 71  |            | m   | D3     | 13       | 6.9         | no                | spindle  | no  | GNAQ         |         |             |          |                     | no               | na                |
| E8      | 88  |            | m   | D3     | 11       | na          | no                | spindle  | yes | GNA11        |         |             |          |                     | no               | na                |
| E9      | 48  |            | f   | D3     | 16       | 10.8        | no                | spindle  | na  | GNA11        |         |             |          |                     | no               | na                |
| E10     | 69  |            | m   | D3     | 11.9     | 5.8         | no                | na       | no  | none         |         |             |          |                     | no               | na                |
| E11     | 20  | yes        | f   | M3     | 15.5     | 11.3        | yes               | spindle  | no  | GNAQ         | BAP1    | 3:52437209  | 4bp del  | frame shift         | no               | na                |
| E12     | 71  |            | f   | M3     | 13.6     | 10.4        | no                | mixed    | no  | GNA11        | BAP1    | 3:52439796  | C→CA     | frame shift         | no               | na                |
| E13     | 77  |            | m   | M3     | 11       | na          | yes               | spindle  | no  | none         | BAP1    | 3:52443601  | G→A      | p.E31K              | no               | na                |
|         |     |            |     |        |          |             |                   |          |     |              | EPB41L3 | 18:5398073  | A→T      | p.K807*             |                  |                   |
| E14     | 77  |            | m   | M3     | 15       | 14          | yes               | spindle  | no  | none         | EPB41L3 | 18:5398116  | GA→G     | frame shift         | no               | na                |
| E15     | 74  |            | m   | M3     | 12.1     | 11.6        | yes               | na       | na  | GNA11        |         |             |          |                     | no               | na                |
| E16     | 65  |            | f   | M3     | 22.8     | 10.2        | yes               | spindle  | no  | GNA11        |         |             |          |                     | no               | na                |
| E17     | 84  | yes        | m   | M3     | nd       | 12.9        | yes               | spindle  | no  | none         |         |             |          |                     | no               | na                |
| E18     | 70  |            | f   | M3     | 16       | 10          | yes               | na       | no  | GNA11        |         |             |          |                     | no               | na                |
| E19     | 63  | yes        | f   | M3     | 15.8     | 13.4        | no                | spindle  | no  | GNAQ         | BAP1    | 3:52440848  | GC→G     | frame shift         | no               | na                |
| E20     | 24  |            | f   | M3     | 19.2     | 11.1        | yes               | mixed    | no  | GNAQ         |         |             |          |                     | no               | na                |
| E21     | 71  |            | m   | M3     | 11       | na          | no                | spindle  | no  | GNAQ         |         |             |          |                     | no               | na                |
| E22     | 50  | yes        | f   | M3     | na       | 13          | yes               | spindle  | no  | GNAQ         |         |             |          |                     | no               | na                |
| D3-1    | 69  |            | m   | D3     | 8.8      | 8.4         | no                | mixed    | no  | GNA11        | EIF1AX  | X:20159752  | A→G      | p.K3E               | no               | na                |
| D3-2    | 49  |            | m   | D3     | 17.5     | 9.3         | no                | spindle  | no  | GNA11        | EIF1AX  | X:20156713  | G→A      | p.G15D              | no               | na                |
| D3-3    | 63  |            | m   | D3     | na       | na          | na                | na       | na  | nd           | EIF1AX  | X:20156740  | G→A      | p.G6D               | yes              | na                |
| D3-4    | 64  |            | m   | D3     | 10.4     | 10.6        | no                | spindle  | no  | GNAQ         | EIF1AX  | X:20156738  | 14bp del | p.K7_G8del          | yes              | yes               |
| D3-5    | 55  |            | m   | D3     | 18.1     | na          | yes               | spindle  | no  | nd           | EIF1AX  | X:20156719  | G→C      | p.R13P              | yes              | yes               |

|       |    |     |   |    |      |      |     |         |    |       |                |                               |        |            |     |     |
|-------|----|-----|---|----|------|------|-----|---------|----|-------|----------------|-------------------------------|--------|------------|-----|-----|
| D3-6  | 64 |     | m | D3 | 13.4 | 12.1 | yes | mixed   | no | GNAQ  | EIF1AX         | X:20159754                    | C→A    | p.P2H      | yes | no  |
| D3-7  | 67 |     | m | D3 | 13.9 | 14.3 | yes | spindle | no | GNAQ  | EIF1AX         | X:20159743                    | G→C    | p.G6R      | yes | no  |
| D3-8  | 38 |     | m | D3 | 9.4  | na   | yes | spindle | no | GNAQ  | EIF1AX         | X:20159743                    | G→C    | p.G6R      | yes | no  |
| D3-9  | 74 |     | f | D3 | na   | 13.4 | yes | spindle | no | GNAQ  | EIF1AX         | X:20159748                    | A→G    | p.N4S      | yes | na  |
| D3-10 | 55 |     | f | D3 | na   | 8.5  | no  | na      | na | GNAQ  | EIF1AX         | X:20159748                    | A→G    | p.N4S      | no  | na  |
| D3-11 | 64 |     | f | D3 | na   | 4.4  | no  | na      | no | GNA11 | EIF1AX         | X:20159747                    | T→G    | p.N4T      | yes | no  |
| D3-12 | 68 |     | m | D3 | 13.1 | 13.3 | yes | spindle | no | GNAQ  | EIF1AX         | X:20156719                    | G→A    | p.R13H     | yes | yes |
| D3-13 | 88 |     | f | D3 | 9.9  | 11.5 | no  | spindle | no | GNAQ  | EIF1AX         | X:20159743                    | G→C    | p.G6R      | no  | na  |
| D3-14 | 68 |     | m | D3 | 8.4  | 1.5  | no  | na      | no | GNAQ  | EIF1AX         | X:20156731                    | GAGG→G | p.G9del    | yes | yes |
| D3-15 | 57 |     | m | D3 | 13.9 | 12   | no  | spindle | no | GNAQ  | EIF1AX         | X:20156742                    | A→G    | p.K7_G8del | yes | yes |
| D3-16 | 48 |     | m | D3 | 12.4 | 8.6  | na  | spindle | no | GNA11 | SF3B1          | 2:198267484                   | C→T    | p.R625C    | no  | na  |
| D3-17 | 72 |     | m | D3 | 13.5 | 11.7 | yes | spindle | no | GNAQ  | SF3B1          | 2:198267483                   | G→A    | p.R625H    | yes | no  |
| D3-18 | 62 |     | m | D3 | 14.5 | 11.3 | yes | spindle | no | GNA11 | SF3B1          | 2:198267483                   | G→A    | p.R625H    | yes | yes |
| D3-19 | 68 |     | m | D3 | 13.7 | 4.5  | no  | na      | no | GNA11 | SF3B1          | 2:198267484                   | C→T    | p.R625C    | yes | yes |
| D3-20 | 75 |     | m | D3 | 17.4 | 11.4 | yes | mixed   | no | GNAQ  | SF3B1          | 2:198267483                   | G→A    | p.R625H    | yes | yes |
| D3-21 | 65 |     | m | D3 | 12.1 | 8.5  | yes | spindle | no | GNAQ  | SF3B1          | 2:198267483                   | G→A    | p.R625H    | yes | yes |
| D3-22 | 45 |     | m | D3 | 21.3 | 16.2 | yes | spindle | no | none  | SF3B1          | 2:198267483                   | G→A    | p.R625H    | yes | yes |
| D3-23 | 62 |     | m | D3 | na   | na   | na  | na      | na | GNAQ  | SF3B1          | 2:198267484                   | C→T    | p.R625C    | no  | na  |
| D3-24 | 57 |     | m | D3 | na   | 7.9  | no  | spindle | no | GNAQ  | SF3B1          | 2:198267751                   | CGTG→C | p.V576del  | no  | na  |
| D3-25 | 44 |     | f | D3 | 17.6 | 8.8  | no  | spindle | no | nd    |                |                               |        |            | yes | na  |
| D3-26 | 66 |     | f | D3 | 23.3 | 11.4 | yes | spindle | no | none  |                |                               |        |            | yes | na  |
| D3-27 | 59 |     | f | D3 | 13.5 | 13.3 | yes | spindle | no | GNAQ  |                |                               |        |            | no  | na  |
| D3-28 | 26 |     | m | D3 | 17.7 | 12.2 | yes | spindle | no | GNAQ  |                |                               |        |            | no  | na  |
| D3-29 | 72 |     | m | D3 | 20.7 | 7.4  | no  | mixed   | no | none  |                |                               |        |            | no  | no  |
| D3-30 | 60 |     | f | D3 | 12.2 | 9.9  | yes | spindle | no | nd    |                |                               |        |            | no  | na  |
| D3-31 | 68 |     | m | D3 | 8.3  | 1.9  | no  | na      | no | nd    |                |                               |        |            | no  | na  |
| M3-1  | 54 | yes | m | M3 | 13.7 | 13.1 | no  | na      | no | GNA11 | EIF1AX<br>BAP1 | X:20159748<br>exon 9 deletion | A→C    | p.N4T      | no  | na  |
| M3-2  | 61 |     | m | M3 | 10.4 | 10.6 | yes | spindle | no | GNA11 |                |                               |        |            | no  | na  |
| M3-3  | 37 | yes | m | M3 | 13.3 | 11.9 | yes | na      | na | GNA11 |                |                               |        |            | no  | na  |
| M3-4  | 74 |     | m | M3 | 13.5 | 5.1  | no  | na      | no | GNAQ  |                |                               |        |            | no  | na  |
| M3-5  | 60 | yes | f | M3 | na   | 13.4 | yes | spindle | no | GNAQ  |                |                               |        |            | no  | na  |
| M3-6  | 85 |     | m | M3 | na   | 10.5 | no  | spindle | no | GNA11 |                |                               |        |            | no  | na  |

|       |    |     |   |         |      |      |     |             |    |       |               |                           |            |                    |    |     |
|-------|----|-----|---|---------|------|------|-----|-------------|----|-------|---------------|---------------------------|------------|--------------------|----|-----|
| M3-7  | 61 | yes | f | M3      | 22   | 12.1 | yes | mixed       | no | GNA11 |               |                           |            |                    | no | na  |
| M3-8  | 41 |     | f | M3      | na   | 7.5  | yes | na          | no | GNA11 |               |                           |            |                    | no | na  |
| M3-9  | 81 | yes | f | M3      | 21   | 6.9  | no  | spindle     | no | GNA11 |               |                           |            |                    | no | na  |
| M3-10 | 74 |     | m | M3      | 2.1  | 11.6 | yes | na          | no | GNA11 |               |                           |            |                    | no | na  |
| M3-11 | 75 |     | f | M3      | na   | 12.2 | yes | spindle     | no | GNA11 |               |                           |            |                    | no | na  |
| M3-12 | 69 | yes | m | M3      | 16.9 | 11.9 | yes | spindle     | no | nd    |               |                           |            |                    | no | na  |
| M3-13 | 56 | yes | m | M3      | 11.6 | 12.3 | yes | spindle     | no | none  | SF3B1<br>BAP1 | 2:198267484<br>3:52438566 | C→T<br>C→T | p.R625C<br>p.R385* | no | na  |
| M3-14 | 63 | yes | f | M3      | na   | 12.9 | yes | spindle     | no | none  |               |                           |            |                    | no | na  |
| M3-15 | 63 |     | f | M3      | 14   | 9.9  | yes | spindle     | no | none  |               |                           |            |                    | no | na  |
| M3-16 | 68 | yes | m | M3      | 12.7 | 6.9  | yes | mixed       | no | GNA11 |               |                           |            |                    | no | na  |
| M3-17 | 48 |     | f | M3      | na   | 13.8 | yes | spindle     | no | GNA11 |               |                           |            |                    | no | na  |
| M3-18 | 60 | yes | f | M3      | na   | na   | na  | na          | na | GNAQ  |               |                           |            |                    | no | na  |
| M3-19 | 39 |     | m | M3      | 16.6 | 5.7  | yes | mixed       | no | GNAQ  |               |                           |            |                    | no | na  |
| M3-20 | 56 |     | m | M3      | 12.6 | na   | yes | mixed       | no | GNAQ  |               |                           |            |                    | no | na  |
| M3-21 | 67 |     | f | M3      | 13.4 | 12   | yes | na          | no | GNA11 |               |                           |            |                    | no | na  |
| M3-22 | 63 | yes | m | M3      | 1.4  | 11.3 | yes | mixed       | no | GNAQ  |               |                           |            |                    | no | na  |
| M3-23 | 63 | yes | f | M3      | 15.8 | 13.8 | no  | spindle     | no | GNAQ  |               |                           |            |                    | no | na  |
| M3-24 | 63 | yes | m | M3      | 11.7 | 12.6 | yes | spindle     | no | none  |               |                           |            |                    | no | na  |
| M3-25 | 91 |     | f | M3      | 11.8 | 11   | no  | spindle     | no | GNAQ  |               |                           |            |                    | no | na  |
| M3-26 | 62 | yes | f | M3      | 21.6 | 12.6 | no  | spindle     | no | GNA11 |               |                           |            |                    | no | na  |
| M3-27 | 69 |     | f | M3      | 15.3 | 13.2 | yes | spindle     | no | GNAQ  |               |                           |            |                    | no | na  |
| M3-28 | 50 | yes | f | M3      | 18   | 13.6 | yes | na          | na | GNA11 |               |                           |            |                    | no | na  |
| M3-29 | 70 |     | f | M3      | 16   | 10   | yes | na          | no | GNA11 |               |                           |            |                    | no | na  |
| M3-30 | 56 |     | m | M3      | 11.7 | 8.4  | yes | na          | na | GNA11 |               |                           |            |                    | no | na  |
| M3-31 | 52 |     | f | M3      | 14.4 | 12   | no  | spindle     | na | GNAQ  |               |                           |            |                    | no | na  |
| M3-32 | 70 |     | m | M3      | 21   | 10.7 | yes | mixed       | no | GNAQ  |               |                           |            |                    | no | na  |
| M3-33 | 70 | yes | m | M3      | 13.4 | 10.1 | yes | na          | no | GNA11 |               |                           |            |                    | no | na  |
| M3-34 | 73 |     | m | M3      | na   | 16   | no  | epithelioid | no | GNA11 |               |                           |            |                    | no | na  |
| M3-35 | 48 |     | m | M3      | 14.7 | 5.2  | no  | spindle     | no | GNA11 |               |                           |            |                    | no | na  |
| pM3-1 | 41 |     | m | partM3q | 16.1 | 8.1  | no  | na          | no | GNAQ  | SF3B1         | 2:198267483               | G→A        | p.R625H            | no | yes |
| pM3-2 | 76 |     | m | partM3q | 15.6 | 8.4  | no  | spindle     | no | GNAQ  | SF3B1         | 2:198267484               | C→T        | p.R625C            | no | no  |
| pM3-3 | 55 | yes | m | partM3q | na   | 8.4  | no  | spindle     | no | GNAQ  | SF3B1         | 2:198267484               | C→T        | p.R625C            | no | yes |

|          |    |     |   |           |      |      |     |             |     |       |        |             |          |            |    |     |
|----------|----|-----|---|-----------|------|------|-----|-------------|-----|-------|--------|-------------|----------|------------|----|-----|
| pM3-4    | 51 |     | m | partM3q   | 20   | 14.4 | no  | spindle     | no  | none  | SF3B1  | 2:198267483 | G→A      | p.R625H    | no | yes |
| pM3-5    | 57 |     | m | partM3q   | 9.5  | 8.7  | no  | na          | no  | GNA11 | SF3B1  | 2:198267483 | G→A      | p.R625H    | no | no  |
| pM3-6    | 65 |     | m | partM3q   | 22.9 | 11.5 | no  | mixed       | no  | GNA11 | SF3B1  | 2:198267483 | G→A      | p.R625H    | no | yes |
| pM3-7    | 57 |     | f | partM3p   | 12.6 | 10.9 | yes | spindle     | na  | GNA11 | SF3B1  | 2:198267483 | G→A      | p.R625H    | no | na  |
| pM3-8    | 52 |     | m | partM3p,q | 22   | 11   | no  | spindle     | no  | GNAQ  | EIF1AX | X:20156742  | A→C      | p.K7_G8del | no | na  |
| pM3-9    | 57 |     | f | partM3p,q | 18.4 | 7.4  | no  | spindle     | no  | GNAQ  |        |             |          |            | no | na  |
| pM3-10   | 70 |     | m | partM3p,q | 14.7 | 13.8 | no  | mixed       | no  | GNAQ  |        |             |          |            | no | no  |
| pM3-11   | 47 |     | m | partM3q   | 20.6 | 11.9 | no  | spindle     | no  | GNA11 |        |             |          |            | no | yes |
| pM3-12   | 51 |     | f | partM3p,q | 18.7 | 12.8 | yes | spindle     | na  | GNA11 |        |             |          |            | no | na  |
| pM3-13   | 73 |     | m | partM3p   | 16.8 | 9.5  | no  | spindle     | na  | nd    |        |             |          |            | no | yes |
| D3met-1  | 78 | yes | f | D3        | na   | 11.3 | no  | epithelioid | no  | GNAQ  | SF3B1  | 2:198267741 | GAAC→G   | p.EP579A   | no | na  |
| D3met-2  | 39 | yes | m | D3        | 20.9 | 9.2  | yes | epithelioid | no  | GNA11 | SF3B1  | 2:198267490 | T→C      | p.Y623H    | no | na  |
| D3met-3  | 47 | yes | m | D3        | 18.1 | 4.9  | no  | mixed       | no  | none  | SF3B1  | 2:198267491 | G→C      | p.E622D    | no | na  |
| D3met-4  | 61 | yes | m | D3        | na   | 10.8 | yes | na          | no  | nd    |        |             |          |            | no | na  |
| D3met-5  | 47 | yes | f | D3        | 11.3 | 9.3  | no  | spindle     | no  | GNAQ  |        |             |          |            | no | na  |
| D3met-6  | 70 | yes | m | D3        | 18.2 | 12.4 | yes | spindle     | no  | GNA11 |        |             |          |            | no | na  |
| D3met-7  | 71 | yes | f | D3        | na   | 11.6 | no  | na          | no  | none  |        |             |          |            | no | na  |
| D3met-8  | 67 | yes | m | D3        | 14.6 | 3    | no  | mixed       | yes | none  |        |             |          |            | no | na  |
| D3met-9  | 62 | yes | f | D3        | 17.4 | 12.6 | yes | spindle     | yes | nd    |        |             |          |            | no | na  |
| D3met-10 | 71 | yes | m | D3        | 18   | 14.8 | yes | spindle     | no  | GNAQ  | BAP1   | 3:52438450  | 44bp del |            | no | na  |

Tumor samples E-1 to E-22 were analyzed by Exome Sequencing. Targeted re-sequencing was performed on samples M3-1 to M3-35 and D3-1 to D3-31 which were randomly chosen from the cohort of 374 tumor samples and on selected samples with partial monosomy 3 (pM3-1 to pM3-13) and disomy 3 that developed metastases (D3met-1 to D3met-10). Chr.3, chromosome 3 status as determined by microsatellite analysis (MSA); age, age at diagnosis; met.death, death of patient due to metastases; LBD, largest basal tumor diameter; height, tumor height; EOG, extra ocular growth; position, mutations are referred to by giving the first affected nucleotide of the mutation according to the hg19/GRCh37 assembly; type, nucleotide change refers to the coding strand; *EIF1AX* cDNA seq, indicates samples in which entire *EIF1AX* coding sequencing was performed on cDNA; na, data not available; nd, not determined due to shortage of DNA; none, neither *GNAQ* nor *GNA11* mutations were detected. *EPB41L3* was sequenced in all tumor samples excluding the following: D3-3, D3-5, D3-19, D3-25, D3-31, D3met-3, D3met-4, D3met-6, D3met-9, pM3-13. *BAP1* was sequenced in all D3, partM3, D3met tumors and those M3 tumors with a mutation in either *SF3B1* or *EIF1AX*, excluding samples D3met-4, D3met-9, D3-19, D3-25, D3-31, pM3-3, pM3-



6. In all these samples, sequencing was not performed due to shortage of DNA. A gene is listed in table 3 if a mutation was identified. In all cases mutations in *GNAQ* or *GNA11* affect amino acid (AA) Q209. We sequenced exon 4 (R183) in all samples without a mutation of Q209 but could not detect any mutation. An exon 9 deletion of *BAP1* was identified in tumor sample M3-1 by multiplex ligation-dependent probe amplification (MLPA) using the SALSA MLPA KIT P027-C1 (MRC-Holland).

**Supplementary Table 4.** Association of *SF3B1* and *EIF1AX* genotype with clinical and histopathological features of uveal melanoma.

| Variable                 | SF3B1    |          |                   | EIF1AX   |           |                   | SF3B1 or EIF1AX |          |                   |
|--------------------------|----------|----------|-------------------|----------|-----------|-------------------|-----------------|----------|-------------------|
|                          | wt       | mut      | p                 | wt       | mut       | p                 | wt              | mut      | p                 |
| age at diagnosis         |          |          |                   |          |           |                   |                 |          |                   |
| median [years]           | 62       | 58       | 0.1               | 61       | 61        | 0.79              | 62              | 59       | 0.25              |
| largest basal diameter   |          |          |                   |          |           |                   |                 |          |                   |
| median [mm]              | 14.6     | 15.5     | 0.75              | 15.1     | 13.1      | <b>0.007</b>      | 15              | 14.4     | 0.06              |
| tumor height             |          |          |                   |          |           |                   |                 |          |                   |
| median [mm]              | 10.5     | 9.9      | 0.5               | 10.5     | 9.9       | 0.45              | 10.6            | 9.8      | 0.25              |
| ciliary body involvement |          |          |                   |          |           |                   |                 |          |                   |
| yes                      | 45 (51%) | 11 (48%) | 0.75              | 50 (55%) | 6 (30%)   | 0.1               | 39 (57%)        | 17 (40%) | 0.1               |
| no                       | 42(49%)  | 12 (52%) |                   | 40 (45%) | 14 (70%)  |                   | 28 (41%)        | 26 (60%) |                   |
| cell type                |          |          |                   |          |           |                   |                 |          |                   |
| epithelioid              | 1 (1%)   | 2 (10%)  | 0.24              | 3 (4%)   | 0 (0%)    | 0.44              | 1 (2%)          | 2 (6%)   | 0.5               |
| mixed                    | 13 (20%) | 3 (16%)  |                   | 14 (20%) | 2 (13%)   |                   | 11 (22%)        | 5 (15%)  |                   |
| spindle                  | 53 (79%) | 14 (74%) |                   | 54 (76%) | 13 (87%)  |                   | 40 (76%)        | 27 (79%) |                   |
| EOG                      |          |          |                   |          |           |                   |                 |          |                   |
| yes                      | 3 (4%)   | 1 (5%)   | 1                 | 4 (5%)   | 0 (0%)    | 1                 | 3 (5%)          | 1 (3%)   | 1                 |
| no                       | 74 (96%) | 19 (95)  |                   | 75 (95%) | 18 (100%) |                   | 56 (95%)        | 37 (97%) |                   |
| GNAQ status              |          |          |                   |          |           |                   |                 |          |                   |
| GNAQ mut                 | 35 (45%) | 10 (48%) | 1                 | 32 (40%) | 13 (72%)  | <b>0.02</b>       | 22 (37%)        | 23 (59%) | <b>0.04</b>       |
| GNAQ wt                  | 43 (55%) | 11 (52%) |                   | 49 (60%) | 5 (28%)   |                   | 38 (63%)        | 16 (41%) |                   |
| GNA11 status             |          |          |                   |          |           |                   |                 |          |                   |
| GNA11 mut                | 32 (41%) | 8 (38%)  | 1                 | 35 (43%) | 5 (28%)   | 0.3               | 27 (45%)        | 13 (33%) | 0.3               |
| GNA11 wt                 | 46 (59%) | 13 (62%) |                   | 46 (47%) | 13 (72%)  |                   | 33 (55%)        | 26 (67%) |                   |
| sex                      |          |          |                   |          |           |                   |                 |          |                   |
| female                   | 38 (43%) | 4 (17%)  | <b>0.029</b>      | 38 (42%) | 4 (20%)   | 0.080             | 34 (50%)        | 8 (19%)  | <b>0.0012</b>     |
| male                     | 50 (57%) | 19 (83%) |                   | 53 (58%) | 16 (80%)  |                   | 34 (50%)        | 35 (81%) |                   |
| chromosome 3 status      |          |          |                   |          |           |                   |                 |          |                   |
| M3                       | 46 (52%) | 1 (4%)   | <b>&gt;0.0001</b> | 46 (51%) | 1 (5%)    | <b>&gt;0.0001</b> | 45 (66%)        | 2 (5%)   | <b>&gt;0.0001</b> |
| partM3                   | 6 (7%)   | 7 (31%)  |                   | 12 (13%) | 1 (5%)    |                   | 5 (7%)          | 8 (18%)  |                   |
| D3                       | 36 (41%) | 15 (65%) |                   | 33 (36%) | 18 (90%)  |                   | 18 (27%)        | 33 (77%) |                   |

Associations between clinical tumor characteristics and *SF3B1* and *EIF1AX* genotype were assessed by Fisher's exact two tailed t-test for categorical variables. Numerical variables such as age at diagnosis, tumor height, and largest basal diameter were analyzed by Chi-square approximation. The standard deviations in these datasets were similar between the groups being compared. wt, no mutation detected, P = p-value. For other abbreviations, see legend to Supplementary Table 3. The association between *GNAQ* and *EIF1AX* mutation status barely reaches significance. Taking multiple testing into account this difference should not be regarded as significant.

**Supplementary Table 5.** Primers used for amplification and sequencing of the coding regions of *SF3B1*, *EPB41L3*, *EIF1AX* on genomic DNA and the entire *EIF1AX* or *EIF1AY* coding regions on cDNA. All primer sequences are given from 5' to 3' direction.

| Gene                   | Exon       | amplicon size [bp] | fw Primer                  | rev Primer                 |
|------------------------|------------|--------------------|----------------------------|----------------------------|
| EPB41L3                | 2          | 338                | GAGCATCCTAGTTTTCTTGCG      | ACCAAGTTAAAGCCGATCC        |
| EPB41L3                | 3          | 450                | AAATGGCAAACAGTATTTAGGC     | TGATCCCCTGTTACAGACTAGG     |
| EPB41L3                | 4          | 275                | TGGTTTTATCTCTGATATTTGGG    | GTGGAGAAAGTGATCCACCC       |
| EPB41L3E               | 5          | 209                | CGCACTGCATTTAGGGAGAG       | TGGGCTACCAATTCAGACAAC      |
| EPB41L3                | 6          | 246                | TTAAGGCAGTTCTGGCCATC       | GCTACCAGATGTAAGCACGC       |
| EPB41L3                | 7          | 385                | GGAGAAATTATTTGCCACG        | GAAGAGGTGGGTTGTGTGC        |
| EPB41L3                | 8          | 336                | TGGTGCCTCCATAGGACTTC       | GCTTAAAAGACAAGCAGAGATTTG   |
| EPB41L3                | 9          | 376                | TTTTGCATAAGTAAACCAGCC      | CACTGTGTCCACAATGCTC        |
| EPB41L3                | 10         | 416                | TTTATACCTGCAGCATTTTAAAGAC  | GGTGACAATGAACTTGAAGGG      |
| EPB41L3                | 11         | 386                | CATGCAAAACACATGACCTC       | GCTTTTCAACATACAATATCCAGG   |
| EPB41L3                | 12         | 423                | CAAGGCAAACCTGGTATTTTG      | TCCTGGTTTACAGCCTCAGC       |
| EPB41L3                | 13-1       | 506                | GGCAACAGTGGCATGCG          | AAAGTTGGGGAAAGAGAGG        |
| EPB41L3                | 13-2       | 419                | AGCTACAGACAGCAAACCTGGC     | GCCAGCTAACACTGTTTCGG       |
| EPB41L3                | 14         | 216                | GTCTGACCTGTGCCAGAGC        | CTTAAACACAGAGCCACCCC       |
| EPB41L3                | 15         | 220                | TACACGTGCCACATTTAGC        | TGAACGCTGTAGACAAACAATG     |
| EPB41L3                | 16         | 492                | TGTTTGTGGTAGTGCCATGAG      | CTGTTGGGCACTGAGCATC        |
| EPB41L3                | 17         | 289                | AAGCTGTGAATGTTTATGTGCC     | CTGGATGCAACCACACTC         |
| EPB41L3                | 18         | 538                | CTGGCTTTAGACATCCTGGC       | TGCTGATCTAAATTTCCAGGC      |
| EPB41L3                | 19         | 293                | AACCACCAAGAGAGGAAAAGG      | TGCAGTTCTATGTAAACACACTAGG  |
| EPB41L3                | 20         | 259                | TGCCTTAAATAACGTAGCCAAC     | CCAACCTGTGAGGAGTTCTG       |
| EPB41L3                | 21-22      | 632                | ATGATGTCAGCATCTTCGGC       | ATGAGAGGGAAAGTGCCCC        |
| SF3B1                  | 12         | 439                | AACTCATGCTGTCTATGTAAAATGTG | ACATGTATGGTGTGTACTIONTGTGC |
| SF3B1                  | 13-14      | 679                | TCCCTTGATTAACAAAAGTCCTG    | TGAGTCCAGTCTGGGCAAC        |
| SF3B1                  | 15-16      | 616                | TGAACATATTCTGCAGTTTGGC     | TCAAACAGTATTCGTGTAACATACAG |
| EIF1AX                 | 1          | 320                | GAAAAGCGACGCAAAGAGTC       | CTGGGTGACCTGCAATCTAC       |
| EIF1AX                 | 2          | 406                | GGGTAGGGAGGTGATAATGTG      | CTGTAATCGTGCCACCACAC       |
| EIF1AX                 | 3          | 326                | CCCAACTGGTGCAACTTTATTC     | TTACCAAGGTAAGTCTTTTGGG     |
| EIF1AX                 | 4          | 245                | ACCGCTCCTGGCCTAAAATC       | ATGCCTGAAAACAAAACCTGGC     |
| EIF1AX                 | 5          | 263                | AGTAAAACGGTGAGATTTGATTG    | CATAGTTCCTTACCTAACCCAGC    |
| EIF1AX                 | 6          | 315                | CTCCCATCTTGACTTAGCAGTG     | GGATGTTAGGGGAAAGTTGG       |
| EIF1AX                 | 7          | 163                | TGGATTTGTTTCTCACATAGCC     | GGACAATCTTCAGAAAAGATGGA    |
| GNAQ/11                |            |                    | see reference 7 and 8      |                            |
| BAP1                   |            |                    | see reference 10           |                            |
| <b>cDNA sequencing</b> |            |                    |                            |                            |
| EIF1AY/XcDNA           | 1-3        | 136                | TGCCCAAGAATAAAGGTAAAGG     | GTCCATTTCCCAACTTTTTGAT     |
| EIF1AYcDNA             | all coding | 695                | GTGCGCGTCAGCAGTTTATTAG     | CAGTTTGCTTTTCAGAAACTACACAC |
| EIF1AXcDNA             | all coding | 608                | CCTCCAGCACCTACTTGGTC       | TCTGCTTTAACAATTGCATTCAT    |
